# Supplementary material for: Knock Down of Plakophillin 2 Dysregulates Adhesion Pathway through Upregulation of miR200b and Alters the Mechanical Properties in Cardiac Cells
Source: PubMed Central journal article supplement (PMC6952926; doi:10.3390/cells8121639), 2019-12-14
Supplement: cells-08-01639-s001.pdf [file cells-08-01639-s001.pdf]

## **Knock Down of Plakophilin 2 Dysregulates Adhesion Pathway through Upregulation of miR200b and Alters the Mechanical Properties in Cardiac Cells**

Puzzi L. §, Borin D. §, Gurha P., Lombardi R., Martinelli V., Weiss M., Andolfi L., Lazzarino M., Mestroni L., Marian A.J. and Sbaizero O\*.

§ = share first authorship

### **\* Corresponding Author**

Orfeo Sbaizero, PhD.; Engineering and Architecture Department; University of Trieste; Via Valerio 10; 34127 Trieste (Italy). Phone (+39)040-5583770; fax: (+39)040572044; Email: [sbaizero@units.it](mailto:sbaizero@units.it)

**Lentiviral vector production, cell culture and immunofluorescence analysis:** The lentiviruses were produced by transfecting the plasmids into 293T cells using X-tremeGENE9 DNA transfection reagent (Roche Life Science) and the viral particles were harvested at 48 and 72 hrs post-transfection, cleared by precipitation and finally filtered through 0.45 µm-pore cellulose acetate filters (WWR International). 70-90% confluent HL-1<sup>PKP2</sup> cells were subjected to 48 hrs of virus infection and then cultured in virus-free medium for another 24 hrs; GFP signal was used to assess transduction efficiency by both fluorescence microscopy and FACS. GFP positive cells were isolated by flow cytometry. Asynchronous growing HL-1 cells were seeded in Petri dishes pre-coated with 0.005% fibronectin and 0.02% gelatin and cultured in Claycomb medium supplemented by 2 mM L-glutamine, 10% of fetal bovine serum, 100U/ml penicillin, 100 µg/ml streptomycin and 10 mM Norepinephrine and incubated at 37° C and 5% CO<sub>2</sub>. All chemicals for cell culture were purchased from Sigma-Aldrich.

Immunostaining of HL\_1 cells was performed by first washing the cells twice with PBS and fixing with 4% PFA at room temperature for 20 minutes; thereafter aldehydes were quenched with 0.1 M glycine for 20 minutes at room temperature. Cells were made permeable with 0.5% Triton X-

100 for 10 minutes, blocked with 1:5 goat serum in PBS for 1 h at room temperature and incubated with an anti  $\alpha$ -tubulin (mouse monoclonal Sigma Aldrich T5168, dilution 1:4000) or an anti Vinculin (mouse monoclonal Sigma Aldrich V9131, dilution 1:400) primary antibody diluted in blocking solution overnight at 4°C. Then, cells were washed 3 times with 0.5% Triton X-100 and finally incubated with an Alexa-Fluor 594 conjugated anti mouse or anti rabbit secondary antibody (Thermo Fisher Scientific) diluted 1:1000 in blocking solution for 60 min at room temperature. F-Actin filaments were counterstained with Alexa Fluor 594 Phalloidin (1:500 Life Technologies A12381) in PBS for 45 min at room temperature. Each slide was then mounted in Vectashield with DAPI (Vector Labs) to counterstain nuclei. For image acquisition, a Nikon C2 Confocal Microscope System equipped with a Plan-Apochromat  $\lambda$  60X/ 1.40 oil objective was used.

### **mRNA, microRNA targets analysis and quantitative PCR**

Genes of interest were analysed by real time PCR using specific primers, as follows: Rap2c FW 5'-ATGAGGGAATACAAGGTAGTGGT-3' and REV 5'-ACTTCGATCTCTTTGCGGTAGA-3'; Src FW 5'-CAATGCCAAGGGCCTAAATGT-3' and REV 5'-TGTTTGGAGTAGTAAGCCACGA-3'; Itga1 FW 5'-CCTTCCCTCGGATGTGAGTCA-3' and REV 5'-AAGTTCTCCCCGTATGGTAAGA-3'; Col4a4 FW 5'-CGGGCTAACAGCATTTACTGC-3' and REV 5'-CCAGAAAGGGGGACTGGAGT-3'; Col4a5 FW 5'-GAAAAAGGCG AACAAGGTCTTC-3' and REV 5'-CAGGAGGCCCTCTATCACCA-3'; Pik3cb FW CTATGGC AGACAACCTTGACAT-3' and REV 5'-CTTCCCGAGGTA CTCCA ACT-3'; Arhgef3 FW 5'-TCAAACCCCTTTCCAGAGTCA-3' and REV 5'-TCTCCGCTTTGTGCTTGAGG-3'; RPL37 FW 5'-CGCAAGAGGAAGTATAACTGGAG-3' and REV 5'-TCTGAATCTGCGGTAGACAATCT-3'. Annealing temperature was set at 60° C for all samples.

### **Single cell spectroscopy experiments using atomic force microscopy (AFM)**

Biomechanical experiments were carried out through a Solver Pro-M AFM from NT-MDT (Moscow Russia), as previously reported(1,2). For these measurements, sQube CP-PNPL-Au-C cantilevers were used, with a nominal spring constant of 0.08 N/m, which was checked prior each experiment by Sader method. A spherical gold probe of about 5  $\mu\text{m}$ -diameter was glued at the cantilever's apex. Measurements on single living cells were performed in physiological conditions of medium and temperature, within one hour. Since the nuclear elasticity is correlated with the stages of cell division(3), cells with nuclei optically showing mitosis were excluded. For each investigated area, a preliminary scan was made to assess the cell morphology and the nuclear position, which corresponds to the highest portion of the cell. In order to avoid possible artefacts due to substrate stiffness and/or due to hydrodynamic forces, indentations were performed above the nucleus, at the constant speed of 1  $\mu\text{m/s}$  for approach and withdrawal of the cantilever.

Cell elasticity was calculated from the first portion of the indentation curve (10% of cell deformation).

Here, the experimental data were fitted with the model proposed by Sneddon for spherical probes (4):

$$F = \frac{E}{(1-\nu^2)} \cdot \left( \frac{R^2 + a^2}{2} \cdot \log \frac{R+a}{R-a} - aR \right) \quad (1)$$

$$\delta = \frac{a}{2} \cdot \log \frac{R+a}{R-a} \quad (2)$$

Where  $F$  is the loading force,  $E$  is the Young's modulus,  $\nu$  the Poisson's ratio,  $R$  the radius of the probe,  $a$  is the contact radius (function of the tip penetration) and  $\delta$  is the probe penetration into the cell. Approximating the cell to an incompressible body (i.e. a flexible object filled with liquid), the Poisson's ratio was assumed as  $\nu = 0.5$  (5). All the curves analysis was performed using AtomicJ software (6).

The model used for estimating the Young's modulus value is conventionally used to yield a general idea of cell elasticity (7). Other models could be used for this task. One fairly new and accurate is the "Brush Model" developed by Sokolov et al. (8,9). In the present study, it has been decided to use a model which does not consider the brush since (i) this model is the one most commonly used, (ii) the

cell line was the same throughout the all research and (iii) the same protocol/methodology and the same model has been used for all cells and indentations. Therefore, it has been considered that the calculated Young's modulus values might be compared for all specimens within the presented experiments. Furthermore, resulting Young's modulus data are reasonably similar to others reported by another group for the same cell line (10).

To describe the cell viscoelastic behaviour towards an external applied force, we used a parameter introduced by Klymenko et al. (11) and indicated as “plasticity index”  $\eta$  (even though “plastic” stands for non-recoverable deformation). This was assessed from the hysteresis between the approach and withdrawal curves as:

$$\eta=1- (A_2/A_1) \tag{3}$$

where  $A_1$  and  $A_2$  are the areas under the loading and unloading curves (green box in Figure S1), respectively. Intermediate values between a fully elastic ( $\eta=0$ ) and a fully plastic behaviour ( $\eta=1$ ), indicate mixed viscoelastic properties.

For both the Young's modulus and the plasticity index assessment, each cell was subjected to three consecutive indentations at the same position and the mean of the results was considered as a single cell value ( $n=1$ ).

Cell-to-ECM protein interaction was assessed through a JPK NanoWizard II AFM equipped with a CellHesion module, using tipless V-shaped silicon nitride gold covered cantilevers having nominal spring constant value of 0.32 N/m (NanoWorld, Innovative Technologies).  $O_2$  plasma treated cantilevers were functionalized with fibronectin (Thermo Fisher Scientific) at the final concentration of 20  $\mu\text{g/ml}$  for 15 hrs at 4  $^\circ\text{C}$ , and stored in PBS (12). Before each experiment, the cantilever spring constant was calibrated using the thermal noise method. Measurements were performed according to published protocols(13-15) (Figure S2). Briefly, HL-1 cell suspension was overlaid on a BSA coated glass coverslip inserted into a petri dish previously coated with type I collagen or fibronectin (both from Thermo Fisher Scientific) at the final concentration of 50 and 20  $\mu\text{g/ml}$ , respectively. A single

cell from the suspension was captured by pressing it with the fibronectin-functionalized cantilever against the glass for 30 sec with a contact force of 0.5 nN. Next, the cell was lifted up from the surface and allowed establishing a firm adhesion to the cantilever for about 20 minutes. Afterwards, the cantilever with the cell was moved far away reaching a coated plastic surface and the adhesion measurements were performed at a constant force of 0.5 nN for 20 seconds. After each force measurement, the cell was retracted to recover for 60 seconds before repeating the measure on the same spot or adhering to a different spot on the surface. During contact, the force exerted was kept constant using the AFM closed loop feedback mode. The cantilever was withdrawn at constant speed of 5  $\mu\text{m/s}$  over pulling ranges of 80  $\mu\text{m}$  to ensure complete detachment of the cell from substrate.

During this step, the cantilever deflection, which is proportional to the vertical force that exists between the cell and substrate, is recorded in a force-distance curve. This curve provides information regarding the cell adhesion. The work that is required to detach the cell can be used to describe the adhesion strength of the cell. It is calculated from the area that is enclosed by the retraction- force-distance curve. This curve also carries other information: after the cell starts to detach from the substrate, individual force steps can be observed. During this phase, the receptors either detaches from the substrate surface or are pulled away from the cell cortex as a membrane tether. While cell membrane is still in contact with the substrate, either of these processes can occur. During the final phase of detachment, the cell body is no longer in contact with the substrate and, thus, attachment is due only to the tethers. Since the receptors are anchored in the cell cortex they unbind as the force increases (in the AFM curve they are denoted as jumps or ruptures). The second type of unbinding event occurs when membrane tethers are pulled out of the cell. In this case, long plateaus of constant force characterize tethers. Our withdrawn (unloading) curves were analyzed classifying receptors detachment events as “rupture” or “tether” based on the slope of the curve preceding the force step.

Withdrawn curves were analysed using the JPK Data Processing software. Positive steps at the right of the minimum force were automatically identified (using default fit parameters values: “Smoothing” = 5; “Significance” = 0.001). Detachment events were classified as “rupture” or “tether” based on the

slope of the curve preceding the force step as follows: values  $\leq -0.15\text{mN/m}$ , corresponding to the 15% derivation were associated to ruptures, while slopes between  $-0.15$  and  $0.15\text{ mN/m}$  were classified as tethers(14). Intervals between steps lower than  $12.5\text{ nm}$  were discarded, as fit was made only on two experimental points. For these experiments, each cell was subjected to 4-6 consecutive indentations at the same collagen or fibronectin spot and the mean of the results was considered as a single cell-ECM interaction (n=1).

### **Actin aggregates**

A quantification of the actin aggregates amount has been done using imageJ software. The calculations were performed for every cell line on 20 cells from 4 independent experiment. The results are shown in the figure below and presented as the amount of actin aggregates on the total cytoskeleton area. They are: (median: NT = 1.08%, WT = 0.97%, PKP2 = 2.90%, PKP2/antimiR= 2.59%)( *p* value calculated using unpaired Wilcoxon-Mann-Whitney test (confidence level 95%), NT vs WT: *p*-value = 0.4652, NT vs PKP2: *p*-value =  $1.466\text{e-}07$ , NT vs antimiR: *p*-value =  $1.466\text{e-}07$ , WT vs PKP2: *p*-value =  $1.475\text{e-}07$ , WT vs antimiR: *p*-value =  $1.475\text{e-}07$ , PKP2 vs antimiR: *p*-value = 0.04873).

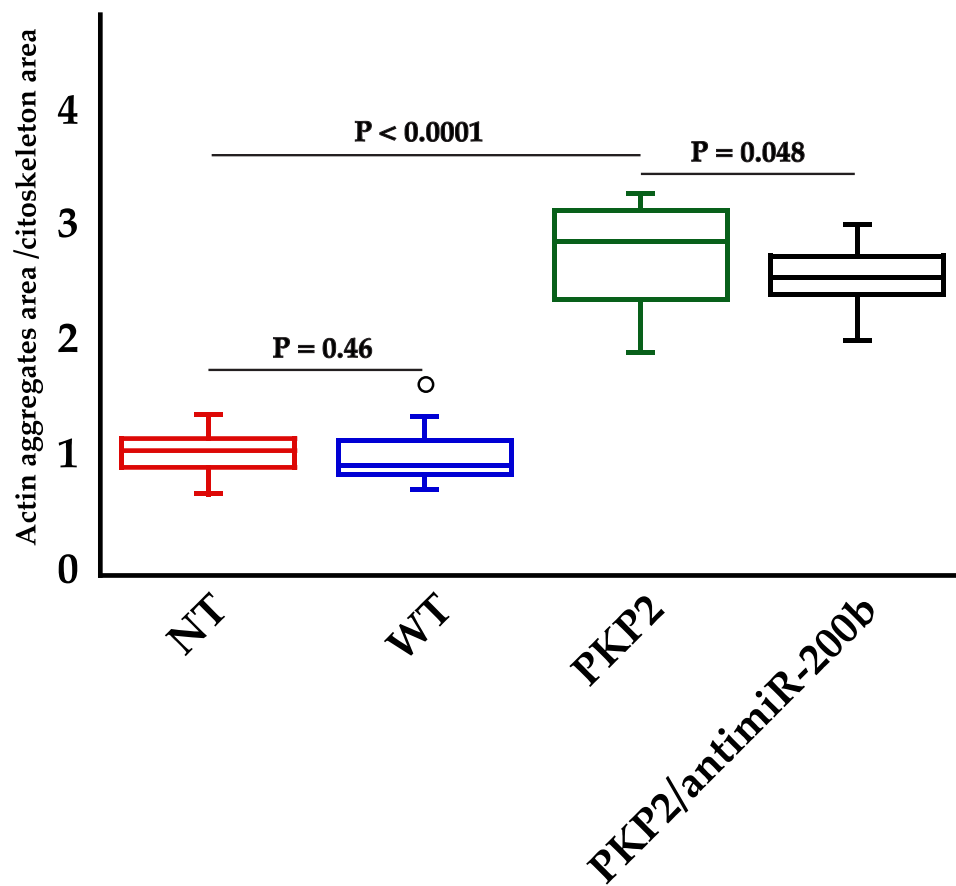

**Supplementary Figure S1.** A quantification of the actin aggregates amount found in the cells cytoskeleton

## SUPPLEMENTARY REFERENCES

1. Puzzi L, Borin D, Martinelli V, Mestroni L, Kellsell DP, Sbaizero O. Cellular biomechanics impairment in keratinocytes is associated with a C-terminal truncated desmoplakin: An atomic force microscopy investigation. *Micron*. 2018;106:27-33.
2. Borin D, Puzzi L, Martinelli V, Cibinel M, Lapasin R, Sbaizero O. An engineering insight into the relationship of selective cytoskeletal impairment and biomechanics of HeLa cells. *Micron*. 2017;102:88-96.
3. Matzke R, Jacobson K, Radmacher M. Direct, high-resolution measurement of furrow stiffening during division of adherent cells. *Nature cell biology*. 2001;3(6):607-10.
4. Sneddon IN. The relation between load and penetration in the axisymmetric boussinesq problem for a punch of arbitrary profile. *Int J Eng Sci*. 1964;3:47-57.
5. Radmacher M. Measuring the elastic properties of living cells by the atomic force microscope. *Methods in cell biology*. 2002;68:67-90.
6. Hermanowicz P, Sarna M, Burda K, Gabrys H. AtomicJ: an open source software for analysis of force curves. *The Review of scientific instruments*. 2014;85(6):063703.
7. Carl P, Schillers H. Elasticity measurement of living cells with an atomic force microscope: data acquisition and processing. *Pflugers Archiv : European journal of physiology*. 2008;457(2):551-9.
8. Guz N, Dokukin M, Kalaparthi V, Sokolov I. If cell mechanics can be described by elastic modulus: study of different models and probes used in indentation experiments. *Biophysical journal*. 2014;107(3):564-75.
9. Dokukin M, Ablaeva Y, Kalaparthi V, Seluanov A, Gorbunova V, Sokolov I. Pericellular Brush and Mechanics of Guinea Pig Fibroblast Cells Studied with AFM. *Biophysical journal*. 2016;111(1):236-46.
10. Kossivas F, Michaelides M, Hadjisavvas A, Kyprianou A, Kyriacou K, Constantinides C. Elasticity Measurements from Left Ventricular Murine HL-1 Cardiomyocytes using Atomic Force Microscopy. *The FASEB Journal*. 2015;29(1\_supplement):799.8.



11. Klymenko OW-Z, J.; Lekka, M; Kwiatek, W.M. Energy Dissipation in the AFM Elasticity Measurements. *Acta Physica Polonica A*. 2009;115:4.
12. Bharadwaj M, Strohmeyer N, Colo GP, Helenius J, Beerenwinkel N, Schiller HB, et al. alphaV-class integrins exert dual roles on alpha5beta1 integrins to strengthen adhesion to fibronectin. *Nature communications*. 2017;8:14348.
13. Andolfi L, Bourkoula E, Migliorini E, Palma A, Pucer A, Skrap M, et al. Investigation of adhesion and mechanical properties of human glioma cells by single cell force spectroscopy and atomic force microscopy. *PloS one*. 2014;9(11):e112582.
14. Chu C, Celik E, Rico F, Moy VT. Elongated membrane tethers, individually anchored by high affinity alpha4beta1/VCAM-1 complexes, are the quantal units of monocyte arrests. *PloS one*. 2013;8(5):e64187.
15. Friedrichs J, Helenius J, Muller DJ. Quantifying cellular adhesion to extracellular matrix components by single-cell force spectroscopy. *Nature protocols*. 2010;5(7):1353-61.

**Supplementary Table 1. Summary of the genes altered by PKP2 downregulation.** Overlap between miR-200 targets genes and dysregulated genes in HL-1<sup>PKP2</sup> detected in RNA-seq analysis revealed that out of 816 differential expressed potential targets, 560 genes were suppressed (p<0.001).

| Gene-ID       | Gene Symbol   | MG33304 | MG33303 | MG33306 | MG33305 | q_value  | FC       |
|---------------|---------------|---------|---------|---------|---------|----------|----------|
| Krt80         | Krt80         | 0.02    | 0.03    | 0.93    | 0.6     | 0.022243 | 30.5425  |
| Mgat3         | Mgat3         | 0.02    | 0       | 0.39    | 0.4     | 1.66E-05 | 21.89637 |
| 4932418E24Rik | 4932418E24Rik | 0.08    | 0.04    | 1.16    | 1.16    | 0.040599 | 17.88034 |
| Nptx1         | Nptx1         | 0.04    | 0.05    | 0.51    | 0.53    | 6.95E-08 | 12.47215 |
| RGS3          | Rgs3          | 1.23    | 0.89    | 10.78   | 10.88   | 0        | 8.426225 |
| Hivep3        | Hivep3        | 1.3     | 1.68    | 2.76    | 2.54    | 0.000128 | 7.672605 |
| Hivep3        | Hivep3        | 0.14    | 0.06    | 0.07    | 0.12    | 0.000128 | 7.672605 |
| Zcchc24       | Zcchc24       | 0.81    | 0.82    | 6.55    | 6.17    | 0        | 7.519725 |
| TIMP3         | Timp3         | 0.24    | 0.3     | 2.14    | 1.82    | 0        | 6.783645 |
| PODXL         | Podxl         | 0.72    | 0.74    | 5.21    | 4.5     | 0        | 6.390263 |
| NOTCH1        | Notch1        | 0.2     | 0.16    | 1.11    | 0.9     | 0        | 5.037838 |
| THBD          | Thbd          | 2.78    | 2.3     | 13.38   | 12.28   | 0        | 4.944279 |
| ETS1          | Ets1          | 0.16    | 0.09    | 0.59    | 0.55    | 7.29E-08 | 4.908215 |
| ZCCHC3        | Zcchc3        | 0.17    | 0.11    | 0.86    | 0.57    | 7.02E-06 | 4.790255 |
| Hlf           | Hlf           | 0.2     | 0.11    | 0.83    | 0.8     | 1.27E-08 | 4.680739 |
| Fstl4         | Fstl4         | 0.05    | 0.03    | 0.35    | 0.29    | 0.011022 | 3.371436 |
| E130309F12Rik | E130309F12Rik | 0.7     | 0.87    | 2.63    | 2.56    | 3.47E-10 | 3.250179 |
| Rps6ka2       | Rps6ka2       | 5.52    | 5.19    | 17.25   | 15.95   | 0        | 3.023525 |
| DUSP5         | Dusp5         | 1.56    | 1.05    | 4.31    | 3.6     | 9.97E-15 | 2.965387 |
| MAP3K6        | Map3k6        | 0.53    | 0.42    | 1.4     | 1.08    | 9.38E-07 | 2.921686 |
| Dact1         | Dact1         | 0.59    | 0.53    | 1.78    | 1.67    | 0.00013  | 2.918841 |

| Gene-ID | Gene Symbol | MG33304 | MG33303 | MG33306 | MG33305 | q_value  | FC       |
|---------|-------------|---------|---------|---------|---------|----------|----------|
| PTPRM   | Ptpm        | 0.27    | 0.46    | 0.99    | 1       | 8.75E-10 | 2.879424 |
| PLAU    | Plau        | 0.52    | 0.59    | 1.77    | 1.35    | 1.17E-05 | 2.840903 |
| Napb    | Napb        | 1.76    | 2       | 5.43    | 5.2     | 8.86E-09 | 2.65058  |
| PHF15   | Phf15       | 0.46    | 0.37    | 1.15    | 0.98    | 2.57E-05 | 2.576895 |
| Frem1   | Frem1       | 2.53    | 2.96    | 6.88    | 7.25    | 0        | 2.465527 |
| Jag2    | Jag2        | 0.82    | 0.95    | 2.44    | 2.14    | 3.05E-08 | 2.458426 |
| Fhl1    | Fhl1        | 23.75   | 23.13   | 60.26   | 58.78   | 0        | 2.446972 |
| SLC2A3  | Slc2a3      | 2.58    | 2.22    | 5.37    | 4.82    | 1.18E-05 | 2.383514 |
| ACOT7   | Acot7       | 19.57   | 17.59   | 47.11   | 42.26   | 0        | 2.336728 |
| NACC2   | Nacc2       | 1.76    | 1.45    | 3.9     | 3.66    | 1.9E-11  | 2.313103 |
| ASAP2   | Asap2       | 0.2     | 0.21    | 0.48    | 0.42    | 0.048604 | 2.29226  |
| Cacna1c | Cacna1c     | 3.06    | 3.32    | 7.46    | 6.67    | 0        | 2.286936 |
| WNK1    | Wnk1        | 12.74   | 11.93   | 30.67   | 27.05   | 0        | 2.274337 |
| Phactr2 | Phactr2     | 10.65   | 10.91   | 24.67   | 24.02   | 0        | 2.273698 |
| ZBED4   | Zbed4       | 3.01    | 2.77    | 7.39    | 6.59    | 0        | 2.265985 |
| GNB4    | Gnb4        | 1.84    | 2.05    | 4.51    | 4       | 0.005311 | 2.200025 |
| Rfx3    | Rfx3        | 1.07    | 1.06    | 2.17    | 2       | 4.23E-06 | 2.072599 |
| SLC35F2 | Slc35f2     | 1.59    | 1.42    | 3.46    | 3.18    | 1.59E-05 | 2.072078 |
| REEP5   | Reep5       | 19.26   | 18.47   | 42.54   | 39.59   | 0        | 2.063445 |
| Taf4a   | Taf4a       | 4.51    | 4.42    | 9.49    | 8.61    | 2.51E-11 | 2.034499 |
| Gpr161  | Gpr161      | 0.73    | 0.68    | 1.35    | 1.37    | 0.000429 | 2.029302 |
| HIPK2   | Hipk2       | 2.85    | 2.85    | 6.16    | 5.53    | 1.13E-08 | 2.014495 |
| LRP11   | Lrp11       | 0.37    | 0.24    | 0.64    | 0.55    | 0.014825 | 1.968097 |
| CAP2    | Cap2        | 16.72   | 15.69   | 33.18   | 32.56   | 0        | 1.966595 |
| Glcci1  | Glcci1      | 2.77    | 2.18    | 5.42    | 7.48    | 2.45E-10 | 1.964746 |

| Gene-ID  | Gene Symbol | MG33304 | MG33303 | MG33306 | MG33305 | q_value  | FC       |
|----------|-------------|---------|---------|---------|---------|----------|----------|
| Nova1    | Nova1       | 0.32    | 0.4     | 0.83    | 0.72    | 5.06E-05 | 1.949492 |
| TNFRSF21 | Tnfrsf21    | 1.2     | 1.06    | 2.35    | 2.17    | 2.24E-05 | 1.936216 |
| Slc24a4  | Slc24a4     | 1.16    | 1.1     | 2.17    | 2.44    | 0.003401 | 1.9115   |
| ELK3     | Elk3        | 0.27    | 0.48    | 0.7     | 0.63    | 0.029069 | 1.872517 |
| ADIPOR2  | Adipor2     | 24.6    | 24.5    | 48.98   | 45.78   | 0        | 1.871734 |
| INPP1    | Inpp1       | 2.13    | 1.95    | 4.35    | 3.75    | 0.001038 | 1.859247 |
| Sbf1     | Sbf1        | 6.34    | 6.02    | 12.56   | 11.25   | 5.69E-14 | 1.856658 |
| SLC38A9  | Slc38a9     | 0.59    | 0.57    | 1.01    | 1.01    | 0.002332 | 1.854167 |
| Hivep3   | Hivep3      | 1.3     | 1.68    | 2.76    | 2.54    | 0.03627  | 1.828735 |
| Hivep3   | Hivep3      | 0.14    | 0.06    | 0.07    | 0.12    | 0.03627  | 1.828735 |
| KLHDC10  | Klhdc10     | 29.88   | 28.64   | 55.52   | 55.67   | 0        | 1.827731 |
| WDFY1    | Wdfy1       | 4.69    | 4.36    | 9.06    | 8.2     | 0.007871 | 1.827057 |
| MAP3K1   | Map3k1      | 2.69    | 2.06    | 4.76    | 3.86    | 5.22E-07 | 1.813242 |
| PSMF1    | Psmf1       | 14.38   | 13.95   | 30.04   | 27.98   | 0        | 1.797353 |
| Fyn      | Fyn         | 1.13    | 1.31    | 2.15    | 2.02    | 0.005718 | 1.777707 |
| DNAJC5   | Dnajc5      | 27.09   | 25.77   | 50.23   | 46.31   | 9.97E-15 | 1.753041 |
| PDE4A    | Pde4a       | 3.76    | 2.66    | 5.77    | 5.34    | 3.67E-05 | 1.752007 |
| Tln2     | Tln2        | 1.86    | 1.81    | 3.26    | 3.05    | 2.95E-09 | 1.735057 |
| TOMM34   | Tomm34      | 30.64   | 28.94   | 54.4    | 52.18   | 0        | 1.729104 |
| ARID2    | Arid2       | 2.63    | 2.67    | 4.81    | 5.09    | 2.24E-11 | 1.716535 |
| Tmem170  | Tmem170     | 1.5     | 1.08    | 1.4     | 1.26    | 0.025376 | 1.713441 |
| MED30    | Med30       | 22.92   | 25.61   | 40.67   | 45.31   | 1.31E-11 | 1.710977 |
| MEF2A    | Mef2a       | 21.3    | 21.73   | 39.99   | 36.74   | 6.75E-13 | 1.701665 |
| Ncoa7    | Ncoa7       | 0.62    | 0.85    | 1.55    | 1.46    | 0.010067 | 1.699557 |
| Zeb1     | Zeb1        | 3.3     | 3.07    | 6.37    | 5       | 3.34E-06 | 1.694834 |

| Gene-ID | Gene Symbol | MG33304 | MG33303 | MG33306 | MG33305 | q_value  | FC       |
|---------|-------------|---------|---------|---------|---------|----------|----------|
| MTMR12  | Mtmr12      | 7.04    | 6.85    | 13.21   | 11.63   | 1.48E-11 | 1.689288 |
| NUDCD1  | Nudcd1      | 7.22    | 7.24    | 12.53   | 13.07   | 3.07E-06 | 1.668957 |
| HES1    | Hes1        | 5.16    | 4.58    | 7.47    | 8.31    | 2.68E-05 | 1.668102 |
| ARHGAP1 | Arhgap1     | 34.08   | 30.49   | 57.43   | 52.22   | 2.04E-13 | 1.667268 |
| NECAP2  | Necap2      | 20.53   | 19.93   | 37.25   | 35.1    | 1.7E-12  | 1.665595 |
| PTPN1   | Ptpn1       | 9.5     | 8.63    | 19.47   | 16.77   | 2.48E-12 | 1.657331 |
| Dennd1b | Dennd1b     | 8.74    | 9.19    | 18.78   | 18.11   | 1.13E-11 | 1.643506 |
| CDKN1B  | Cdkn1b      | 28.94   | 28.96   | 49.49   | 49.65   | 2.59E-10 | 1.63941  |
| CAST    | Cast        | 18.66   | 18.24   | 31.19   | 30.64   | 1.33E-08 | 1.636178 |
| ELMO2   | Elmo2       | 11.06   | 10.07   | 19.07   | 18.07   | 1.13E-08 | 1.6325   |
| LIMS1   | Lims1       | 19.61   | 20.01   | 39.75   | 38      | 1.91E-13 | 1.631916 |
| ELL2    | Ell2        | 4.19    | 4.35    | 7.2     | 7.09    | 3.1E-08  | 1.630162 |
| HDAC4   | Hdac4       | 2.8     | 2.91    | 4.96    | 4.36    | 2.44E-06 | 1.620895 |
| HDAC4   | Hdac4       | 4.3     | 3.86    | 7.18    | 6.06    | 2.44E-06 | 1.620895 |
| Sox12   | Sox12       | 3.2     | 2.92    | 5.41    | 4.68    | 2.35E-07 | 1.609669 |
| RALGAPB | Ralgapb     | 9.23    | 10.74   | 17.99   | 15.96   | 5.02E-11 | 1.608122 |
| JAZF1   | Jazf1       | 1.63    | 1.42    | 2.59    | 2.49    | 0.002097 | 1.60726  |
| ENC1    | Enc1        | 0.99    | 0.98    | 1.77    | 1.57    | 0.000576 | 1.603919 |
| Snrpb2  | Snrpb2      | 20.52   | 24.5    | 40.42   | 40.04   | 1.67E-10 | 1.591182 |
| ASXL1   | Asxl1       | 9.44    | 9.29    | 15.98   | 14.88   | 2.4E-10  | 1.59111  |
| Dgka    | Dgka        | 2.24    | 2.43    | 3.57    | 4.28    | 0.002759 | 1.58848  |
| Aim1    | Aim1        | 0.71    | 0.55    | 0.89    | 0.97    | 0.038293 | 1.588385 |
| LGR4    | Lgr4        | 5.04    | 5.71    | 9       | 8.77    | 3.15E-06 | 1.573989 |
| PARD6B  | Pard6b      | 1.64    | 1.38    | 2.35    | 2.53    | 0.00077  | 1.568525 |
| DCP1A   | Dcp1a       | 4.8     | 4.8     | 7.92    | 7.59    | 5.1E-07  | 1.557783 |

| Gene-ID  | Gene Symbol | MG33304 | MG33303 | MG33306 | MG33305 | q_value  | FC       |
|----------|-------------|---------|---------|---------|---------|----------|----------|
| PLAGL2   | Plagl2      | 1.46    | 1.14    | 2.13    | 1.72    | 0.000611 | 1.557011 |
| ITM2C    | Itm2c       | 46.56   | 44.6    | 73.42   | 70.75   | 2.13E-12 | 1.54581  |
| Ipo8     | Ipo8        | 8.7     | 8.9     | 14.82   | 14.43   | 6.6E-08  | 1.532839 |
| KLF10    | Klf10       | 10.5    | 10.72   | 16.48   | 17.13   | 8.98E-09 | 1.532376 |
| MANBAL   | Manbal      | 12.8    | 13.13   | 21.53   | 21.17   | 2.68E-06 | 1.530318 |
| Prdm16   | Prdm16      | 2.29    | 1.6     | 2.83    | 3.13    | 0.027582 | 1.525588 |
| FN1      | Fn1         | 3.22    | 2.94    | 5.13    | 4.36    | 3.62E-05 | 1.525467 |
| Clasp1   | Clasp1      | 27.48   | 26.79   | 42.72   | 39.72   | 2.53E-10 | 1.520238 |
| GPX8     | Gpx8        | 6.71    | 8.58    | 12.17   | 10.05   | 0.003036 | 1.515593 |
| ADNP     | Adnp        | 1.56    | 1.54    | 2.77    | 2.2     | 0.004371 | 1.514231 |
| MRE11A   | Mre11a      | 12.17   | 11.3    | 17.65   | 15.63   | 0.000061 | 1.510015 |
| Rnf5     | Rnf5        | 6.75    | 6.53    | 10.46   | 10.2    | 0.000705 | 1.49724  |
| BSG      | Bsg         | 402.35  | 377.61  | 611.85  | 584.55  | 8.29E-10 | 1.495822 |
| GCLC     | Gclc        | 8.02    | 7.92    | 12.1    | 12.62   | 2.56E-05 | 1.492475 |
| NOL12    | Nol12       | 8.47    | 8.13    | 11.34   | 12.83   | 0.004173 | 1.482285 |
| VPS13B   | Vps13b      | 4.29    | 4.59    | 7.17    | 6.51    | 4.14E-07 | 1.474251 |
| TSGA14   | Tsga14      | 2.74    | 2.73    | 4.74    | 4.07    | 0.02658  | 1.472676 |
| IFRD2    | Ifrd2       | 14.99   | 13.38   | 23.3    | 20.87   | 6.51E-07 | 1.472085 |
| AES      | Aes         | 105.3   | 90.82   | 151.1   | 142.66  | 3.7E-10  | 1.471443 |
| SMARCAD1 | Smarcad1    | 4.24    | 4.75    | 6.56    | 7.09    | 0.010732 | 1.471292 |
| Ppm1b    | Ppm1b       | 23.52   | 22.2    | 36.08   | 34.84   | 8.83E-06 | 1.467686 |
| Immp2l   | Immp2l      | 3.64    | 3.57    | 5.54    | 6.57    | 0.049354 | 1.467317 |
| SERPINB9 | Serpinb9    | 2.49    | 2.05    | 3.37    | 3.58    | 0.00372  | 1.466848 |
| RAB22A   | Rab22a      | 11.32   | 10.16   | 15.55   | 15.01   | 1.03E-05 | 1.466622 |
| Pbx3     | Pbx3        | 12.37   | 12.9    | 19.39   | 17.86   | 0.000271 | 1.456454 |

| Gene-ID  | Gene Symbol | MG33304 | MG33303 | MG33306 | MG33305 | q_value  | FC       |
|----------|-------------|---------|---------|---------|---------|----------|----------|
| POFUT1   | Pofut1      | 7.76    | 7.49    | 12.29   | 10.94   | 3.34E-06 | 1.454448 |
| HYLS1    | Hyls1       | 7.41    | 8.69    | 11.76   | 12.34   | 0.007821 | 1.447862 |
| TMEM65   | Tmem65      | 9.25    | 8.97    | 14.11   | 13.8    | 4.74E-06 | 1.43896  |
| Pkia     | Pkia        | 19.44   | 21.07   | 30.5    | 31.38   | 2.31E-08 | 1.435706 |
| SCRN1    | Scrn1       | 1.81    | 1.79    | 2.75    | 2.53    | 0.038541 | 1.431997 |
| Jmy      | Jmy         | 3.92    | 3.82    | 6.21    | 5.4     | 0.000379 | 1.43144  |
| GOLT1B   | Golt1b      | 19.02   | 20.46   | 30.29   | 29.47   | 1.95E-07 | 1.42988  |
| Fam57a   | Fam57a      | 8.96    | 8.23    | 13.11   | 11.69   | 0.034183 | 1.419681 |
| Six1     | Six1        | 2.32    | 1.39    | 2.94    | 2.21    | 0.005392 | 1.418853 |
| ADAR     | Adar        | 6.19    | 5.98    | 8.59    | 9.6     | 0.0006   | 1.418582 |
| Zfp217   | Zfp217      | 2.65    | 2.39    | 3.96    | 3.38    | 0.014816 | 1.417933 |
| YTHDF1   | Ythdf1      | 15.48   | 16.82   | 24.52   | 23.09   | 3.03E-07 | 1.415641 |
| QSOX2    | Qsox2       | 5.8     | 5.66    | 8.85    | 8.01    | 0.00042  | 1.415608 |
| SPATA2   | Spata2      | 5.51    | 5.53    | 8.47    | 7.9     | 0.033395 | 1.414062 |
| Chd2     | Chd2        | 7.35    | 7.77    | 11.04   | 10.08   | 8.66E-05 | 1.413159 |
| St13     | St13        | 65.58   | 71.61   | 101.68  | 98.81   | 7.27E-06 | 1.412346 |
| Ppp2r3a  | Ppp2r3a     | 7.86    | 8.31    | 11.27   | 12.09   | 0.000106 | 1.411153 |
| DNA2     | Dna2        | 8.41    | 9.07    | 12.79   | 12.9    | 7.77E-06 | 1.410956 |
| SLC25A30 | Slc25a30    | 10.22   | 10.58   | 15.57   | 14.29   | 0.000736 | 1.409991 |
| Rps6ka6  | Rps6ka6     | 5.82    | 5.64    | 8.43    | 7.16    | 0.00107  | 1.40845  |
| DDAH1    | Ddah1       | 0.88    | 0.94    | 1.85    | 1.36    | 0.047534 | 1.407905 |
| Kras     | Kras        | 5.78    | 7.17    | 10.7    | 9.83    | 0.000837 | 1.406761 |
| MTDH     | Mtdh        | 31.15   | 34.5    | 47.3    | 50.05   | 1.17E-06 | 1.4043   |
| Bcl2     | Bcl2        | 1.61    | 1.5     | 2.39    | 1.99    | 0.025099 | 1.400664 |
| CBFA2T2  | Cbfa2t2     | 6.18    | 5.93    | 9.69    | 9.55    | 0.001042 | 1.398412 |

| Gene-ID   | Gene Symbol | MG33304 | MG33303 | MG33306 | MG33305 | q_value  | FC       |
|-----------|-------------|---------|---------|---------|---------|----------|----------|
| AMPD3     | Ampd3       | 9.89    | 8.85    | 14.07   | 12.22   | 0.001873 | 1.397122 |
| NCOA3     | Ncoa3       | 8.55    | 7.88    | 12.61   | 11.05   | 0.002881 | 1.39062  |
| CDYL      | Cdyl        | 4.71    | 4.24    | 6.54    | 5.97    | 0.001061 | 1.390548 |
| Zfr       | Zfr         | 65.34   | 68.76   | 98.31   | 91.72   | 1.88E-07 | 1.387079 |
| Siah1a    | Siah1a      | 5.26    | 6.24    | 8.7     | 8.56    | 0.00155  | 1.38564  |
| RERE      | Rere        | 7.78    | 7.97    | 12.22   | 9.44    | 0.018576 | 1.383272 |
| GHITM     | Ghitm       | 59.22   | 62.79   | 87.11   | 88.89   | 1.59E-07 | 1.383206 |
| ACVR2A    | Acvr2a      | 3.86    | 3.95    | 5.39    | 5       | 0.006433 | 1.382212 |
| Mapk7     | Mapk7       | 3.89    | 3.48    | 5.52    | 4.89    | 0.03634  | 1.382098 |
| Trp53inp2 | Trp53inp2   | 62.64   | 64.08   | 95.33   | 86.05   | 4.71E-06 | 1.380824 |
| TNRC6B    | Tnrc6b      | 3.5     | 3.68    | 5.52    | 4.83    | 1.13E-05 | 1.380356 |
| TBC1D4    | Tbc1d4      | 10.91   | 11.63   | 17.3    | 15.2    | 8.37E-06 | 1.379721 |
| Lpl       | Lpl         | 104.29  | 110.98  | 154.14  | 145.88  | 6.93E-07 | 1.379716 |
| EIF2S2    | Eif2s2      | 78.72   | 88.59   | 128.05  | 120.98  | 4.23E-07 | 1.373171 |
| GATA6     | Gata6       | 11.47   | 11.2    | 16.4    | 15.9    | 0.000611 | 1.372337 |
| HEXIM1    | Hexim1      | 3.36    | 3.29    | 5.28    | 4.25    | 0.002684 | 1.371303 |
| PDRG1     | Pdrg1       | 45.8    | 44.73   | 68.42   | 63.68   | 0.000013 | 1.369745 |
| ROCK2     | Rock2       | 15.72   | 18.25   | 24.94   | 23.66   | 8.27E-07 | 1.369699 |
| Rad21     | Rad21       | 23.24   | 23.19   | 35.13   | 32.55   | 1.79E-06 | 1.368987 |
| Rbm26     | Rbm26       | 7.12    | 7.89    | 10.97   | 10.3    | 0.00458  | 1.36703  |
| LPCAT1    | Lpcat1      | 4.85    | 4.63    | 7.28    | 5.58    | 0.016958 | 1.366197 |
| PLEKHB2   | Plekhb2     | 18.16   | 17.33   | 26.45   | 24.7    | 5.83E-06 | 1.36556  |
| Qk        | Qk          | 35.99   | 35.37   | 52.66   | 48.51   | 9.26E-05 | 1.364261 |
| Qk        | Qk          | 0.8     | 0.65    | 1.7     | 1.21    | 9.26E-05 | 1.364261 |
| PIP4K2A   | Pip4k2a     | 3.42    | 2.99    | 4.39    | 4.14    | 0.005905 | 1.360864 |



| Gene-ID   | Gene Symbol | MG33304 | MG33303 | MG33306 | MG33305 | q_value  | FC       |
|-----------|-------------|---------|---------|---------|---------|----------|----------|
| YWHAB     | Ywhab       | 45.47   | 44.79   | 68.06   | 61.49   | 9.15E-07 | 1.360272 |
| NFYA      | NfyA        | 10.22   | 11.26   | 16.34   | 14.52   | 0.007204 | 1.358941 |
| PDGFA     | Pdgfa       | 13.82   | 12.83   | 20.18   | 19.61   | 0.014361 | 1.358684 |
| LPIN2     | Lpin2       | 5.5     | 4.68    | 6.86    | 7.13    | 0.002166 | 1.356379 |
| PDLIM1    | Pdlim1      | 23.1    | 20.77   | 37.4    | 29.95   | 0.000273 | 1.352694 |
| Sik1      | Sik1        | 9.67    | 8.57    | 13.18   | 12.42   | 0.000129 | 1.346371 |
| DERL1     | Derl1       | 29.91   | 30.5    | 42.73   | 42.69   | 1.23E-05 | 1.344818 |
| PIP5K1B   | Pip5k1b     | 5.06    | 5.03    | 6.87    | 6.72    | 0.006247 | 1.343383 |
| CRLF3     | Crlf3       | 11.91   | 12.39   | 17.74   | 15.95   | 0.000995 | 1.339905 |
| Trim44    | Trim44      | 9.67    | 10.11   | 14.5    | 13.69   | 3.11E-05 | 1.334779 |
| Ccdc47    | Ccdc47      | 26.54   | 31.85   | 38.88   | 38.3    | 5.87E-05 | 1.334071 |
| HNRNPF    | Hnrnpf      | 212     | 230.91  | 308.47  | 306.93  | 2.27E-05 | 1.333284 |
| OSBPL8    | Osbpl8      | 4.39    | 4.93    | 6.72    | 6.49    | 0.000895 | 1.330613 |
| DLAT      | Dlat        | 43.59   | 45.34   | 61.99   | 57.17   | 1.33E-05 | 1.329959 |
| COMMD7    | Commd7      | 23.61   | 22.89   | 33.37   | 31.91   | 0.002596 | 1.328677 |
| CDC42EP1  | Cdc42ep1    | 4.46    | 3.89    | 6.02    | 5.33    | 0.033298 | 1.325599 |
| EIF5      | Eif5        | 35.43   | 36.68   | 52.49   | 51.06   | 1.29E-05 | 1.325425 |
| RASA1     | Rasa1       | 7.03    | 8.6     | 10.69   | 10.63   | 0.001257 | 1.324873 |
| ANKRD28   | Ankrd28     | 5.11    | 4.94    | 6.93    | 7.17    | 0.008186 | 1.322578 |
| Prkar1a   | Prkar1a     | 59.17   | 60.32   | 85.92   | 82.17   | 3.89E-05 | 1.320025 |
| MAPRE1    | Mapre1      | 49.24   | 50      | 69.91   | 74.11   | 1.19E-05 | 1.317138 |
| CPEB4     | Cpeb4       | 6.18    | 6.85    | 9.11    | 8.54    | 0.017815 | 1.314845 |
| PPP1R12A  | Ppp1r12a    | 38.09   | 41.28   | 51.44   | 52.16   | 0.000327 | 1.309776 |
| Secisbp2l | Secisbp2l   | 3.9     | 4.15    | 5.91    | 5.25    | 0.001426 | 1.307054 |
| RFK       | Rfk         | 10.57   | 11.93   | 15.08   | 14.94   | 0.005091 | 1.300948 |

| Gene-ID | Gene Symbol | MG33304 | MG33303 | MG33306 | MG33305 | q_value  | FC       |
|---------|-------------|---------|---------|---------|---------|----------|----------|
| Rfx7    | Rfx7        | 3.08    | 3.31    | 4.73    | 4.21    | 0.025563 | 1.293671 |
| BCL2L2  | Bcl2l2      | 6.27    | 6.89    | 8.95    | 9.03    | 0.00879  | 1.287121 |
| Prkar2a | Prkar2a     | 6.91    | 7.16    | 10.35   | 8.77    | 0.003928 | 1.285457 |
| LPGAT1  | Lpgat1      | 14.23   | 15.95   | 22.77   | 20.58   | 0.000206 | 1.285206 |
| COL4A1  | Col4a1      | 31.34   | 28.2    | 41.85   | 36.55   | 0.000111 | 1.280141 |
| NHLRC2  | Nhlrc2      | 10.3    | 10.2    | 14.11   | 13.25   | 0.012976 | 1.276292 |
| PUM2    | Pum2        | 54.35   | 59.79   | 78.34   | 76.67   | 0.000614 | 1.275763 |
| Tex2    | Tex2        | 15.51   | 14.81   | 20.2    | 18.81   | 0.000712 | 1.275253 |
| UBE2E3  | Ube2e3      | 21.86   | 21.74   | 28.49   | 26.52   | 0.014353 | 1.274552 |
| ESPL1   | Espl1       | 7.99    | 7.2     | 10.82   | 9.29    | 0.002664 | 1.273741 |
| Trio    | Trio        | 3.44    | 3.41    | 4.73    | 4.31    | 0.016401 | 1.272414 |
| Ppp2r5c | Ppp2r5c     | 21.97   | 22.48   | 32.08   | 29.85   | 0.005096 | 1.271995 |
| JUND    | Jund        | 10.13   | 8.94    | 12.2    | 12.51   | 0.003693 | 1.271845 |
| MBOAT7  | Mboat7      | 11.57   | 11.84   | 15.91   | 13.61   | 0.005543 | 1.268972 |
| PRPF40A | Prpf40a     | 36.32   | 37.8    | 47.78   | 46.55   | 0.001665 | 1.265245 |
| HDGFRP3 | Hdgfrp3     | 10.13   | 10.99   | 14.23   | 13.84   | 0.001959 | 1.264476 |
| CDC25B  | Cdc25b      | 10.08   | 9.72    | 14.22   | 11.96   | 0.023384 | 1.263837 |
| Acyp1   | Acyp1       | 18.47   | 19.92   | 25.79   | 25.62   | 0.037419 | 1.261974 |
| MIB1    | Mib1        | 19.21   | 20.33   | 27.54   | 25.73   | 0.005824 | 1.25864  |
| NEDD4   | Nedd4       | 116.39  | 115.31  | 157.43  | 147.04  | 0.001558 | 1.256904 |
| RIT1    | Rit1        | 26.28   | 24.01   | 33.15   | 31.78   | 0.015084 | 1.255991 |
| ARL6IP1 | Arl6ip1     | 94.27   | 97.09   | 126.62  | 126.99  | 0.00045  | 1.254665 |
| ZCCHC2  | Zcchc2      | 4.9     | 4.99    | 6.71    | 5.94    | 0.040483 | 1.249729 |
| DDX24   | Ddx24       | 26.17   | 25.48   | 34.41   | 32.29   | 0.001739 | 1.2492   |
| Fam3c   | Fam3c       | 18.72   | 17.84   | 24.15   | 24.31   | 0.005624 | 1.247964 |

| Gene-ID | Gene Symbol | MG33304 | MG33303 | MG33306 | MG33305 | q_value  | FC       |
|---------|-------------|---------|---------|---------|---------|----------|----------|
| SESN2   | Sesn2       | 7.34    | 6.17    | 8.6     | 8.2     | 0.035519 | 1.247867 |
| VPS13C  | Vps13c      | 5.33    | 5.7     | 7.31    | 7.03    | 0.00454  | 1.247833 |
| WAPAL   | Wapal       | 18.87   | 23.27   | 27.71   | 26.98   | 0.004368 | 1.247131 |
| RMND5A  | Rmnd5a      | 16.04   | 17.68   | 24.03   | 21.69   | 0.002566 | 1.246106 |
| BLCAP   | Blcap       | 14.99   | 15.94   | 19.95   | 19.9    | 0.031309 | 1.244427 |
| YAP1    | Yap1        | 17.7    | 17.22   | 24.05   | 23.96   | 0.007612 | 1.24396  |
| Nbr1    | Nbr1        | 24.63   | 26.27   | 32.39   | 32.38   | 0.002116 | 1.243403 |
| DENND5B | Dennd5b     | 5.42    | 5.55    | 8.18    | 7.4     | 0.009152 | 1.240311 |
| CTSC    | Ctsc        | 13.89   | 13.73   | 17.27   | 15.16   | 0.016239 | 1.239215 |
| Aplp2   | Aplp2       | 57.89   | 54.05   | 75.8    | 70.11   | 0.002876 | 1.230864 |
| HMOX1   | Hmox1       | 18.84   | 17.28   | 24.2    | 20.99   | 0.016205 | 1.228884 |
| VEGFA   | Vegfa       | 20.37   | 19.55   | 25.21   | 25.39   | 0.039137 | 1.227264 |
| USP4    | Usp4        | 17.95   | 16.76   | 22.75   | 21.62   | 0.007121 | 1.22262  |
| Tbc1d2b | Tbc1d2b     | 5.3     | 4.94    | 7.09    | 6.06    | 0.018093 | 1.22252  |
| Myo9a   | Myo9a       | 5.81    | 5.96    | 7.49    | 7.49    | 0.021506 | 1.219239 |
| Fam60a  | Fam60a      | 12.72   | 13.43   | 16.36   | 16.8    | 0.021772 | 1.217956 |
| PHIP    | Phip        | 7.43    | 8.09    | 10.29   | 9.57    | 0.01139  | 1.213597 |
| RND3    | Rnd3        | 26.26   | 27.12   | 33.79   | 34.36   | 0.0083   | 1.206129 |
| KIF13A  | Kif13a      | 9.04    | 8.58    | 11.55   | 10.37   | 0.041871 | 1.205663 |
| Fxr2    | Fxr2        | 30.95   | 29.11   | 37.72   | 37.49   | 0.007404 | 1.205155 |
| ZFP106  | Zfp106      | 16.28   | 14.65   | 20.89   | 20.06   | 0.015302 | 1.203638 |
| CALM1   | Calm1       | 115.87  | 98.23   | 152.94  | 135.14  | 0.010239 | 1.2011   |
| PPP1R11 | Ppp1r11     | 45.42   | 41.22   | 58.65   | 49.63   | 0.026819 | 1.200068 |
| ATP5G3  | Atp5g3      | 464.59  | 446.23  | 578.86  | 573.04  | 0.008199 | 1.20004  |
| KBTBD2  | Kbtbd2      | 15.22   | 15.57   | 19.61   | 19.04   | 0.034227 | 1.196404 |

| Gene-ID  | Gene Symbol | MG33304 | MG33303 | MG33306 | MG33305 | q_value  | FC       |
|----------|-------------|---------|---------|---------|---------|----------|----------|
| IDI1     | Idi1        | 27.35   | 29.35   | 38.5    | 34.65   | 0.011444 | 1.193936 |
| Zc3hav1  | Zc3hav1     | 25.01   | 25.96   | 31.58   | 30.75   | 0.040241 | 1.191238 |
| PRNP     | Prnp        | 32.57   | 31.06   | 39.94   | 38      | 0.018343 | 1.187896 |
| Sdc2     | Sdc2        | 19.39   | 20.33   | 25.27   | 23.77   | 0.019589 | 1.187068 |
| Slc38a2  | Slc38a2     | 21.71   | 21.96   | 28.81   | 26.14   | 0.02516  | 1.187054 |
| BC005537 | BC005537    | 13.49   | 14.42   | 18.68   | 16.57   | 0.046808 | 1.183772 |
| MRPS35   | Mrps35      | 39.47   | 41.61   | 51.07   | 49.02   | 0.041739 | 1.179813 |
| OAZ1     | Oaz1        | 351.07  | 314.32  | 414.43  | 401.67  | 0.017999 | 1.176567 |
| IPO5     | Ipo5        | 96.46   | 98.05   | 123.03  | 115.06  | 0.047865 | 1.155842 |
| FKBP9    | Fkbp9       | 76.91   | 74.13   | 71.4    | 66.82   | 0.043604 | -1.15186 |
| ADAM19   | Adam19      | 16.92   | 16.17   | 15.56   | 13.52   | 0.038945 | -1.16135 |
| Ptbp2    | Ptbp2       | 33.13   | 35.71   | 32.21   | 30.56   | 0.045393 | -1.16263 |
| DYNC1LI2 | Dync1li2    | 44.92   | 47.43   | 42.83   | 40.69   | 0.023627 | -1.16876 |
| PCNP     | Pcnp        | 47.12   | 52.41   | 46.89   | 46.81   | 0.033753 | -1.16951 |
| Prmt7    | Prmt7       | 66.04   | 60.75   | 57.15   | 54.45   | 0.020486 | -1.17796 |
| FBXW11   | Fbxw11      | 19.59   | 18.38   | 18.47   | 16.66   | 0.049596 | -1.17809 |
| PTP4A2   | Ptp4a2      | 112.67  | 119.22  | 99.86   | 103.98  | 0.018603 | -1.17874 |
| PJA2     | Pja2        | 17.99   | 18.34   | 16.7    | 15.76   | 0.036692 | -1.17924 |
| Eri1     | Eri1        | 15.63   | 16.6    | 14.3    | 14.24   | 0.023167 | -1.17937 |
| TAX1BP1  | Tax1bp1     | 66.47   | 72.15   | 61.03   | 61.05   | 0.01324  | -1.1837  |
| Crk      | Crk         | 27.52   | 27.63   | 25.34   | 23.81   | 0.021635 | -1.18719 |
| DNAJC13  | Dnajc13     | 9.28    | 10.05   | 8.89    | 8.25    | 0.023656 | -1.18732 |
| Arhgef17 | Arhgef17    | 15.32   | 13.07   | 13.37   | 11.25   | 0.012101 | -1.18782 |
| ATP11B   | Atp11b      | 8.32    | 9.12    | 7.76    | 7.51    | 0.040945 | -1.18835 |
| CFL2     | Cfl2        | 84.78   | 89.63   | 80.13   | 77.24   | 0.012023 | -1.1897  |

| Gene-ID  | Gene Symbol | MG33304 | MG33303 | MG33306 | MG33305 | q_value  | FC       |
|----------|-------------|---------|---------|---------|---------|----------|----------|
| MED13    | Med13       | 7.01    | 7.17    | 6.57    | 6.4     | 0.019528 | -1.19173 |
| BUB3     | Bub3        | 92.34   | 83.43   | 80.66   | 74.83   | 0.009184 | -1.19313 |
| Pten     | Pten        | 30.55   | 33.17   | 28.71   | 28.24   | 0.008697 | -1.19404 |
| SDPR     | Sdpr        | 97.22   | 92.04   | 83.53   | 80.33   | 0.008601 | -1.19595 |
| NAE1     | Nae1        | 58.76   | 68.65   | 56.5    | 56.22   | 0.009588 | -1.1979  |
| LARP4B   | Larp4b      | 16.48   | 17.86   | 15.48   | 14.88   | 0.014993 | -1.199   |
| CHSY1    | Chsy1       | 7.84    | 7.87    | 7.23    | 6.53    | 0.030751 | -1.2001  |
| IQGAP1   | Iqgap1      | 46.98   | 44.31   | 40.92   | 37.64   | 0.007753 | -1.20057 |
| HSPA5    | Hspa5       | 482.06  | 488.1   | 427.57  | 416.02  | 0.036181 | -1.20164 |
| SFPQ     | Sfpq        | 84.24   | 85      | 74.57   | 72.39   | 0.032389 | -1.20272 |
| PARP1    | Parp1       | 66.29   | 66.9    | 59.67   | 54.01   | 0.008709 | -1.20301 |
| NHP2L1   | Nhp2l1      | 120.53  | 117.67  | 107.69  | 100.84  | 0.00527  | -1.20779 |
| UHRF1BP1 | Uhrf1bp1    | 5.66    | 5.87    | 5.46    | 4.54    | 0.015242 | -1.21087 |
| FAM178A  | Fam178a     | 13.99   | 15.06   | 12.61   | 12.29   | 0.009797 | -1.21356 |
| MAZ      | Maz         | 42.28   | 36.84   | 35.36   | 30.75   | 0.011051 | -1.21515 |
| H6PD     | H6pd        | 5.71    | 5.3     | 4.82    | 4.58    | 0.036328 | -1.21524 |
| KLF6     | Klf6        | 5.32    | 5.15    | 4.71    | 4.35    | 0.042641 | -1.21686 |
| Rap1b    | Rap1b       | 16.38   | 16.51   | 15.32   | 13.4    | 0.023905 | -1.2175  |
| Gdi2     | Gdi2        | 80.7    | 84.19   | 73.59   | 68.64   | 0.012761 | -1.21806 |
| Pip4k2b  | Pip4k2b     | 5.06    | 4.5     | 4.24    | 3.6     | 0.041651 | -1.21915 |
| CRKL     | Crkl        | 12.98   | 12.52   | 11.45   | 10.14   | 0.013131 | -1.21975 |
| DPY19L1  | Dpy19l1     | 17.44   | 17.02   | 15.11   | 14.64   | 0.026387 | -1.2201  |
| CLSPN    | Clspn       | 15.62   | 16.39   | 14.09   | 13.65   | 0.020316 | -1.22108 |
| GNG12    | Gng12       | 18.56   | 18.1    | 16.26   | 17.81   | 0.032172 | -1.22286 |
| MCL1     | Mcl1        | 36.64   | 37.45   | 33.59   | 32.19   | 0.002867 | -1.22364 |

| Gene-ID       | Gene Symbol   | MG33304 | MG33303 | MG33306 | MG33305 | q_value  | FC       |
|---------------|---------------|---------|---------|---------|---------|----------|----------|
| HDLBP         | Hdlbp         | 93.56   | 92.57   | 80.85   | 76.74   | 0.007967 | -1.22406 |
| EZR           | Ezr           | 83.58   | 80.77   | 70.67   | 63.65   | 0.004895 | -1.22412 |
| IGF1R         | Igf1r         | 9.22    | 8.12    | 8.22    | 7.27    | 0.016178 | -1.22473 |
| SLBP          | Slbp          | 48.32   | 50.46   | 44.56   | 45.76   | 0.005125 | -1.22502 |
| Zranb2        | Zranb2        | 44.83   | 50.84   | 40.98   | 41.95   | 0.008972 | -1.22722 |
| UBXN4         | Ubxn4         | 42.48   | 45.29   | 37.73   | 35.85   | 0.002153 | -1.22725 |
| Cnot8         | Cnot8         | 29.26   | 29.99   | 26.42   | 24.93   | 0.008049 | -1.22905 |
| AFF4          | Aff4          | 23.25   | 26.8    | 21.93   | 20.18   | 0.005788 | -1.22908 |
| Pin1          | Pin1          | 33.92   | 31.73   | 27.92   | 26.66   | 0.002129 | -1.23083 |
| LEPROTL1      | Leprotl1      | 12.24   | 12.19   | 9.99    | 10.09   | 0.011898 | -1.2327  |
| TMEM30A       | Tmem30a       | 26.88   | 28.74   | 26.69   | 24.98   | 0.002509 | -1.23321 |
| DCK           | Dck           | 10.92   | 11.43   | 9.44    | 9.77    | 0.013327 | -1.23354 |
| SLC7A6        | Slc7a6        | 22.84   | 21.66   | 20.31   | 17.29   | 0.021428 | -1.23428 |
| GORASP2       | Gorasp2       | 29.61   | 27.84   | 25.25   | 22.82   | 0.009766 | -1.2346  |
| RABEP1        | Rabep1        | 24.07   | 27.23   | 21.64   | 20.61   | 0.035058 | -1.23561 |
| Ddx1          | Ddx1          | 167.8   | 170.72  | 147.37  | 141.35  | 0.001933 | -1.23672 |
| CCDC6         | Ccdc6         | 11.13   | 10.16   | 9.13    | 8.8     | 0.018619 | -1.23789 |
| Tra2b         | Tra2b         | 82.91   | 80.21   | 71.11   | 69.08   | 0.001221 | -1.23886 |
| Rnf11         | Rnf11         | 43.21   | 41.96   | 37.42   | 34.94   | 0.009038 | -1.24006 |
| CD164         | Cd164         | 22.8    | 23.92   | 20.42   | 19.81   | 0.004302 | -1.24027 |
| 1810013L24Rik | 1810013L24Rik | 10.49   | 10.65   | 9.4     | 8.68    | 0.041342 | -1.24082 |
| FAM126A       | Fam126a       | 17.05   | 17.33   | 15.68   | 13.71   | 0.005748 | -1.24085 |
| FRMD6         | Frmd6         | 6.52    | 6.05    | 5.22    | 5.42    | 0.035613 | -1.24105 |
| C78339        | C78339        | 20.08   | 20.41   | 16.09   | 16.24   | 0.020869 | -1.24293 |
| PCBP1         | Pcbp1         | 32.52   | 28.35   | 26.32   | 23.8    | 0.005304 | -1.24674 |

| Gene-ID | Gene Symbol | MG33304 | MG33303 | MG33306 | MG33305 | q_value  | FC       |
|---------|-------------|---------|---------|---------|---------|----------|----------|
| CHRAC1  | Chrac1      | 58.37   | 59.22   | 48.57   | 48.07   | 0.004319 | -1.24774 |
| Dnajb9  | Dnajb9      | 7.92    | 7.44    | 6.86    | 6.17    | 0.045802 | -1.24991 |
| MCFD2   | Mcfd2       | 64.98   | 63.9    | 58.6    | 52.65   | 0.00185  | -1.25029 |
| HEXA    | Hexa        | 62.36   | 66.45   | 52.79   | 51.98   | 0.001072 | -1.25144 |
| PUM1    | Pum1        | 14.41   | 12.99   | 11.53   | 10.05   | 0.017499 | -1.2518  |
| UBE2I   | Ube2i       | 234.87  | 230.07  | 210.6   | 201.98  | 0.006719 | -1.2519  |
| Bptf    | Bptf        | 8.1     | 8.8     | 6.97    | 6.22    | 0.00887  | -1.25253 |
| Sephs1  | Sephs1      | 15.79   | 15.68   | 13.84   | 13.18   | 0.012081 | -1.25473 |
| LSM14A  | Lsm14a      | 17.55   | 17.95   | 16.56   | 14.67   | 0.008396 | -1.25626 |
| PANK3   | Pank3       | 14.5    | 15.95   | 12.99   | 12.77   | 0.000656 | -1.25743 |
| STAM2   | Stam2       | 9.81    | 9.32    | 9       | 7.29    | 0.007842 | -1.25744 |
| NR2C2   | Nr2c2       | 11.81   | 12.51   | 9.44    | 10.11   | 0.019591 | -1.25801 |
| BNIP3L  | Bnip3l      | 37.81   | 40.23   | 45.13   | 37.45   | 0.001069 | -1.25843 |
| FAM168A | Fam168a     | 5.53    | 5.06    | 4.54    | 4.1     | 0.019162 | -1.25942 |
| IRAK2   | Irak2       | 7.75    | 7.66    | 6.63    | 6.36    | 0.032575 | -1.26018 |
| GIGYF2  | Gigyf2      | 15.86   | 17.02   | 13.85   | 13.05   | 0.007765 | -1.26233 |
| ORMDL3  | Ormdl3      | 12.77   | 12.84   | 11.14   | 10.16   | 0.008827 | -1.26448 |
| Abcb7   | Abcb7       | 14.24   | 15.19   | 12.18   | 12.12   | 0.000717 | -1.26484 |
| SEC23A  | Sec23a      | 25.61   | 26.39   | 22.2    | 21.31   | 0.001708 | -1.26503 |
| DENND5A | Dennd5a     | 51.96   | 51.56   | 42.8    | 41.95   | 0.000307 | -1.26651 |
| Otud4   | Otud4       | 30.82   | 31.37   | 27.41   | 26.13   | 0.000352 | -1.26686 |
| Rnf169  | Rnf169      | 7.03    | 7.29    | 5.85    | 5.84    | 0.01381  | -1.26787 |
| PIK3R1  | Pik3r1      | 7.03    | 7.23    | 6.07    | 5.79    | 0.002776 | -1.26883 |
| CCNG2   | Ccng2       | 11.57   | 11.68   | 9.57    | 9.42    | 0.006407 | -1.27001 |
| PRKD3   | Prkd3       | 34.82   | 37.22   | 29.76   | 30.27   | 0.000519 | -1.27007 |

| Gene-ID | Gene Symbol | MG33304 | MG33303 | MG33306 | MG33305 | q_value  | FC       |
|---------|-------------|---------|---------|---------|---------|----------|----------|
| SNIP1   | Snip1       | 15.17   | 14.67   | 13.15   | 11.52   | 0.004525 | -1.27143 |
| TEAD1   | Tead1       | 15.11   | 15.59   | 14.32   | 12.93   | 0.006315 | -1.27281 |
| CCNL1   | Ccnl1       | 22.39   | 24.8    | 21.21   | 19.54   | 0.023094 | -1.27307 |
| VEZF1   | Vezf1       | 9.4     | 8.84    | 7.88    | 7.5     | 0.013131 | -1.27446 |
| REST    | Rest        | 8.6     | 9.02    | 7.43    | 7.04    | 0.004246 | -1.27469 |
| RHEB    | Rheb        | 47.75   | 54.89   | 43.39   | 43.91   | 0.001694 | -1.27567 |
| IFNGR2  | Ifngr2      | 70.93   | 68.64   | 56.33   | 57.07   | 0.000165 | -1.27647 |
| Rhot1   | Rhot1       | 21.79   | 23.49   | 18.95   | 19.34   | 0.00354  | -1.27904 |
| Ptpn11  | Ptpn11      | 23.63   | 23.77   | 20.27   | 18.12   | 0.002558 | -1.27951 |
| Rps6kb1 | Rps6kb1     | 11.72   | 13.28   | 9.83    | 11.29   | 0.030984 | -1.2797  |
| ZFAND5  | Zfand5      | 31.03   | 30.6    | 27.11   | 24.39   | 0.00091  | -1.28161 |
| SRPK2   | Srpk2       | 9.85    | 10.51   | 8.68    | 8.14    | 0.002314 | -1.28243 |
| Ppp4r2  | Ppp4r2      | 24.13   | 26.53   | 21.42   | 20.35   | 0.000955 | -1.28316 |
| PRKAG2  | Prkag2      | 33.77   | 29.7    | 25.26   | 25.89   | 0.008025 | -1.28402 |
| SMC4    | Smc4        | 86.7    | 101.67  | 76.57   | 76.89   | 0.000193 | -1.28436 |
| Spast   | Spast       | 10.85   | 11.6    | 9.73    | 8.91    | 0.006495 | -1.28442 |
| Ulk2    | Ulk2        | 11.98   | 12.5    | 10.24   | 9.6     | 0.003053 | -1.28589 |
| Nudt4   | Nudt4       | 10.09   | 10.47   | 9.04    | 8.03    | 0.01381  | -1.28596 |
| MDFIC   | Mdfic       | 18.68   | 19.06   | 15.64   | 14.91   | 0.005806 | -1.28756 |
| PPP1CC  | Ppp1cc      | 210.75  | 215.91  | 191.39  | 187.56  | 0.000108 | -1.28772 |
| Piga    | Piga        | 5.8     | 5.78    | 5.21    | 4.51    | 0.009989 | -1.28787 |
| ATP13A3 | Atp13a3     | 19.19   | 19.1    | 16.43   | 15.42   | 0.00119  | -1.28832 |
| Asap1   | Asap1       | 11.76   | 11.1    | 9.84    | 8.28    | 0.006313 | -1.2891  |
| Mybl1   | Mybl1       | 18.6    | 21.05   | 15.27   | 15.44   | 0.004047 | -1.29031 |
| ADD1    | Add1        | 36.79   | 34.99   | 30.59   | 28.65   | 0.000555 | -1.29097 |



| Gene-ID | Gene Symbol | MG33304 | MG33303 | MG33306 | MG33305 | q_value  | FC       |
|---------|-------------|---------|---------|---------|---------|----------|----------|
| ILDR2   | Ildr2       | 11.6    | 10.33   | 9.11    | 8.66    | 0.000603 | -1.29178 |
| DNMBP   | Dnmbp       | 2.42    | 2.05    | 1.75    | 1.74    | 0.024789 | -1.29296 |
| Fez2    | Fez2        | 15.98   | 14.95   | 12.44   | 12.81   | 0.002775 | -1.29482 |
| Pmpcb   | Pmpcb       | 104.01  | 105.43  | 87.64   | 82.84   | 6.27E-05 | -1.29518 |
| ARHGAP5 | Arhgap5     | 28.5    | 32.72   | 25.43   | 24.6    | 0.000378 | -1.29523 |
| TTF2    | Ttf2        | 14.86   | 14.47   | 12.09   | 11.2    | 0.000284 | -1.29787 |
| TCF12   | Tcf12       | 10.46   | 10.26   | 8.59    | 7.86    | 0.001732 | -1.29918 |
| YTHDC1  | Ythdc1      | 15.74   | 16.84   | 13.7    | 13.21   | 0.008044 | -1.2998  |
| KPNA1   | Kpna1       | 20.27   | 20.95   | 16.95   | 17.14   | 0.001323 | -1.29981 |
| Mpp5    | Mpp5        | 5.48    | 6.3     | 4.93    | 4.65    | 0.0045   | -1.29998 |
| Osbpl11 | Osbpl11     | 9.3     | 9.42    | 7.54    | 7.56    | 0.002175 | -1.30205 |
| TTC3    | Ttc3        | 51.2    | 57.56   | 45.78   | 43.33   | 0.000346 | -1.30244 |
| Kif26b  | Kif26b      | 12.96   | 12.17   | 10.27   | 9.14    | 0.001464 | -1.30338 |
| Slc6a6  | Slc6a6      | 17.62   | 15.96   | 14.31   | 12.41   | 7.91E-05 | -1.3051  |
| MIER1   | Mier1       | 16.27   | 17.52   | 13.07   | 12.78   | 0.006283 | -1.30519 |
| Rab8b   | Rab8b       | 6.95    | 6.78    | 5.78    | 5.33    | 0.00119  | -1.30853 |
| GATAD2B | Gatad2b     | 6.55    | 5.49    | 5.15    | 4.39    | 0.002959 | -1.30893 |
| CAPN2   | Capn2       | 41.49   | 40      | 33.47   | 30.68   | 3.67E-05 | -1.30955 |
| Ythdf2  | Ythdf2      | 34.07   | 35.17   | 28.14   | 27.21   | 0.000108 | -1.31019 |
| SNX27   | Snx27       | 10.46   | 9.05    | 8.22    | 7.09    | 0.003575 | -1.31023 |
| SPRED1  | Spred1      | 8.8     | 8.08    | 7.66    | 7.3     | 0.007223 | -1.31112 |
| STK17B  | Stk17b      | 14.52   | 14.99   | 11.86   | 11.77   | 0.000299 | -1.31349 |
| ACBD3   | Acbd3       | 16.56   | 16.76   | 13.83   | 12.76   | 0.000422 | -1.31444 |
| BET1L   | Bet1l       | 12.11   | 11.67   | 8.98    | 9.71    | 0.013182 | -1.31581 |
| AGFG1   | Agfg1       | 29.83   | 29.48   | 24.47   | 23.1    | 0.000837 | -1.31604 |

| Gene-ID  | Gene Symbol | MG33304 | MG33303 | MG33306 | MG33305 | q_value  | FC       |
|----------|-------------|---------|---------|---------|---------|----------|----------|
| ATPAF1   | Atpaf1      | 12.58   | 13.11   | 11.36   | 10.64   | 0.012786 | -1.3172  |
| FOSL2    | Fosl2       | 4.75    | 4.43    | 3.81    | 3.34    | 0.001557 | -1.32153 |
| S100pbp  | S100pbp     | 11.95   | 12.12   | 10.63   | 9.98    | 0.018762 | -1.322   |
| FAM160B1 | Fam160b1    | 6.61    | 6.27    | 5.36    | 4.5     | 0.0066   | -1.32254 |
| Ubxn7    | Ubxn7       | 7.28    | 7.91    | 6.37    | 5.77    | 0.000156 | -1.32268 |
| Rnf38    | Rnf38       | 10.17   | 10      | 7.26    | 7.02    | 0.011698 | -1.32314 |
| SACS     | Sacs        | 5.97    | 6.61    | 5.07    | 5.09    | 0.000621 | -1.32329 |
| MESDC1   | Mesdc1      | 7.04    | 6.71    | 5.47    | 5.24    | 0.001407 | -1.32579 |
| PTPN12   | Ptpn12      | 4.74    | 4.84    | 4.29    | 3.83    | 0.01843  | -1.32949 |
| Agap1    | Agap1       | 6.51    | 5.95    | 5.21    | 4.59    | 0.005685 | -1.33005 |
| Ankrd44  | Ankrd44     | 3.82    | 4.14    | 3.19    | 2.96    | 0.033318 | -1.33032 |
| LARP1    | Larp1       | 20.86   | 18.82   | 15.79   | 15.03   | 8.06E-05 | -1.33136 |
| IPO7     | Ipo7        | 93.44   | 100.37  | 78.02   | 75.82   | 0.000251 | -1.33203 |
| Dock9    | Dock9       | 2.6     | 2.78    | 2.13    | 2       | 0.036976 | -1.33205 |
| BNIP3    | Bnip3       | 54.62   | 53.1    | 42.63   | 41.92   | 0.000121 | -1.33259 |
| Yipf5    | Yipf5       | 15.96   | 15.25   | 12.79   | 12.19   | 0.000331 | -1.33544 |
| NOTCH2   | Notch2      | 7.62    | 6.71    | 5.99    | 5.17    | 2.87E-05 | -1.33596 |
| FOXJ3    | Foxj3       | 7.67    | 7.16    | 6.77    | 5.38    | 0.004748 | -1.34301 |
| MAP3K7   | Map3k7      | 20.61   | 20.63   | 13.67   | 14.33   | 4.32E-05 | -1.34394 |
| ABHD10   | Abhd10      | 8.35    | 9.7     | 7.36    | 6.71    | 0.028375 | -1.34543 |
| LGALS8   | Lgals8      | 14.13   | 14.1    | 10.58   | 10.36   | 0.005441 | -1.34622 |
| Lrig1    | Lrig1       | 6.5     | 6.59    | 5.77    | 5.25    | 0.003309 | -1.34674 |
| Rprd1a   | Rprd1a      | 14.96   | 15.68   | 12.51   | 11.42   | 0.000889 | -1.34844 |
| LRRC40   | Lrrc40      | 23.37   | 21.34   | 18.8    | 16.42   | 0.000052 | -1.34971 |
| Ddx3x    | Ddx3x       | 134.19  | 149.95  | 115.28  | 110.37  | 1.57E-05 | -1.35122 |

| Gene-ID  | Gene Symbol | MG33304 | MG33303 | MG33306 | MG33305 | q_value  | FC       |
|----------|-------------|---------|---------|---------|---------|----------|----------|
| Pdik1l   | Pdik1l      | 11.86   | 12.45   | 9.69    | 9.12    | 0.001611 | -1.35208 |
| FRS2     | Frs2        | 3.4     | 3.78    | 2.82    | 2.71    | 0.008208 | -1.35241 |
| Mknk1    | Mknk1       | 16.92   | 16.78   | 14.81   | 12.05   | 0.006823 | -1.35549 |
| AP1S3    | Ap1s3       | 10.16   | 9.93    | 7.68    | 7.31    | 0.003654 | -1.35625 |
| ARL6IP6  | Arl6ip6     | 12.98   | 14.27   | 10.66   | 9.01    | 0.002093 | -1.35652 |
| PKD2     | Pkd2        | 7.26    | 7.2     | 5.93    | 5.52    | 0.000247 | -1.35784 |
| CTDSP2   | Ctdsp2      | 15.92   | 14.63   | 12.04   | 11.24   | 0.000041 | -1.35799 |
| Hsph1    | Hsph1       | 21.27   | 20.7    | 16.24   | 15.4    | 1.55E-05 | -1.35803 |
| UBE2K    | Ube2k       | 29.73   | 29.48   | 23.14   | 23.68   | 5.35E-05 | -1.35808 |
| Pkd1     | Pkd1        | 5.43    | 4.76    | 4.11    | 3.53    | 0.0001   | -1.35901 |
| Lrrc8a   | Lrrc8a      | 9.82    | 8.8     | 7.12    | 6.8     | 0.00035  | -1.35994 |
| Hook3    | Hook3       | 8.05    | 8.2     | 5.97    | 6.17    | 8.13E-05 | -1.36022 |
| Senp5    | Senp5       | 9.34    | 9.6     | 7.9     | 6.89    | 0.000336 | -1.36182 |
| Stard13  | Stard13     | 12.49   | 11.64   | 9.33    | 8.5     | 6.13E-05 | -1.36513 |
| Mboat2   | Mboat2      | 10.36   | 11.19   | 8.58    | 7.99    | 0.004173 | -1.36561 |
| MFHAS1   | Mfhas1      | 11.24   | 10.43   | 8.49    | 7.67    | 5.71E-05 | -1.36585 |
| BAG2     | Bag2        | 37.43   | 36.87   | 29.81   | 26.85   | 7.4E-06  | -1.36905 |
| SEL1L    | Sel1l       | 16.76   | 16.98   | 15.36   | 14.23   | 0.00013  | -1.36946 |
| Cdh20    | Cdh20       | 4.82    | 4.88    | 3.72    | 3.63    | 0.003347 | -1.37015 |
| CTTN     | Ctnn        | 55.13   | 54.66   | 44.5    | 41.76   | 6.84E-07 | -1.37044 |
| SIKE1    | Sike1       | 13.81   | 17.15   | 12.57   | 11.24   | 0.00093  | -1.37075 |
| Mtfr1    | Mtfr1       | 22.48   | 21.45   | 16.08   | 16.88   | 0.000608 | -1.3712  |
| USP25    | Usp25       | 24.04   | 25.66   | 19.38   | 18.17   | 9.27E-06 | -1.37136 |
| BHLHE40  | Bhlhe40     | 24.42   | 23.16   | 18.63   | 16.71   | 4.85E-06 | -1.37231 |
| CDC42SE1 | Cdc42se1    | 20.52   | 19.76   | 14.46   | 15.56   | 0.016672 | -1.37278 |

| Gene-ID  | Gene Symbol | MG33304 | MG33303 | MG33306 | MG33305 | q_value  | FC       |
|----------|-------------|---------|---------|---------|---------|----------|----------|
| LMO4     | Lmo4        | 11.19   | 10.9    | 8.71    | 8       | 0.008267 | -1.37314 |
| CHMP5    | Chmp5       | 38.23   | 41.35   | 29.82   | 30.99   | 2.86E-05 | -1.37583 |
| SETX     | Setx        | 16.76   | 19.19   | 15.47   | 12.66   | 7.61E-06 | -1.37631 |
| Sec24a   | Sec24a      | 9.01    | 8.89    | 9.62    | 8.08    | 0.017896 | -1.37688 |
| Hmgb3    | Hmgb3       | 24.23   | 28.09   | 21.22   | 19.72   | 3.02E-05 | -1.37872 |
| FAT1     | Fat1        | 19.1    | 18.62   | 15.09   | 12.99   | 4.09E-06 | -1.37994 |
| TMEM185B | Tmem185b    | 24.92   | 24.02   | 19.47   | 18.25   | 6.14E-06 | -1.38012 |
| Fmr1     | Fmr1        | 27.56   | 29.97   | 23.1    | 22.75   | 2.15E-05 | -1.38076 |
| EDEM1    | Edem1       | 17.52   | 17.85   | 13.86   | 13.37   | 3.2E-06  | -1.38106 |
| Btf3l4   | Btf3l4      | 49.83   | 58.97   | 47.83   | 44.27   | 1.05E-05 | -1.38345 |
| GSK3B    | Gsk3b       | 12.04   | 13.11   | 10.43   | 8.74    | 2.37E-06 | -1.38375 |
| SMAD7    | Smad7       | 2.74    | 2.51    | 2.3     | 1.87    | 0.008095 | -1.38487 |
| Baz2b    | Baz2b       | 10.48   | 10.23   | 7.93    | 9.8     | 0.005273 | -1.38514 |
| TRIM33   | Trim33      | 5.4     | 5.85    | 4.38    | 4.29    | 7.46E-05 | -1.38527 |
| MAP4K4   | Map4k4      | 32.27   | 33.3    | 25.35   | 23.82   | 1.77E-06 | -1.38735 |
| Bbx      | Bbx         | 19.96   | 22.45   | 16.38   | 15.18   | 5.47E-06 | -1.38753 |
| Lphn2    | Lphn2       | 9.55    | 9.59    | 6.9     | 6.63    | 0.000446 | -1.39042 |
| FNDC3B   | Fndc3b      | 8.39    | 7.61    | 6.47    | 5.52    | 0.000061 | -1.3929  |
| USP32    | Usp32       | 7.46    | 8.15    | 6.01    | 5.79    | 3.52E-05 | -1.3944  |
| Tmem170b | Tmem170b    | 2.84    | 3.16    | 2.3     | 2.21    | 0.000987 | -1.39523 |
| RAB5B    | Rab5b       | 14.97   | 16.08   | 11.83   | 11.14   | 2.57E-05 | -1.39746 |
| SLAIN2   | Slain2      | 20.5    | 20.5    | 15.66   | 14.9    | 3.48E-05 | -1.39812 |
| SGK1     | Sgk1        | 5.82    | 5.66    | 3.27    | 4.54    | 0.005372 | -1.39817 |
| Ptbp1    | Ptbp1       | 108.41  | 100.59  | 83.29   | 71.9    | 4.3E-07  | -1.39892 |
| YWHAQ    | Ywhaq       | 170.83  | 179.3   | 131.09  | 132.25  | 2.38E-06 | -1.39895 |

| Gene-ID       | Gene Symbol   | MG33304 | MG33303 | MG33306 | MG33305 | q_value  | FC       |
|---------------|---------------|---------|---------|---------|---------|----------|----------|
| Fermt2        | Fermt2        | 22.47   | 22.22   | 17.93   | 17.24   | 8.54E-06 | -1.40217 |
| ZC4H2         | Zc4h2         | 2.83    | 3.42    | 2.3     | 2.25    | 0.020316 | -1.40265 |
| TACC1         | Tacc1         | 7.42    | 7.33    | 5.68    | 5.2     | 0.000185 | -1.4035  |
| CD2AP         | Cd2ap         | 17.25   | 19.65   | 14.61   | 12.64   | 1.99E-05 | -1.40552 |
| Gosr2         | Gosr2         | 46.23   | 45.52   | 31.46   | 33.27   | 2.03E-07 | -1.40587 |
| MRFAP1        | Mrfap1        | 236.55  | 255.57  | 186.9   | 181.51  | 1.25E-07 | -1.40657 |
| Socs5         | Socs5         | 3.3     | 3.18    | 2.32    | 2.31    | 0.005291 | -1.40658 |
| CLCN3         | Clcn3         | 12.03   | 13.42   | 9.73    | 9.62    | 6.64E-05 | -1.4074  |
| GNAI3         | Gnai3         | 30.14   | 33.01   | 23.58   | 23.92   | 1.71E-07 | -1.40813 |
| NRP1          | Nrp1          | 81.76   | 82.29   | 58.07   | 57.03   | 2.82E-06 | -1.40824 |
| Atp6v0e       | Atp6v0e       | 220.15  | 215.89  | 165.05  | 161.23  | 5.54E-08 | -1.40875 |
| Zfp148        | Zfp148        | 13.04   | 14.85   | 9.95    | 9.59    | 3.73E-07 | -1.40951 |
| C030046E11Rik | C030046E11Rik | 21.27   | 20.37   | 16.66   | 15.35   | 5.06E-06 | -1.41189 |
| UBA6          | Uba6          | 9.44    | 10.19   | 7.23    | 7.21    | 0.000118 | -1.41753 |
| FAM168B       | Fam168b       | 44.72   | 42.46   | 33.57   | 30.78   | 8.54E-07 | -1.41879 |
| TMOD3         | Tmod3         | 11.74   | 11.42   | 8.66    | 8.59    | 4.98E-06 | -1.41968 |
| PSD3          | Psd3          | 8.72    | 9.77    | 7.73    | 6.86    | 1.13E-05 | -1.42059 |
| DCAF7         | Dcaf7         | 19.16   | 18.53   | 14.35   | 12.76   | 6.98E-06 | -1.42082 |
| CTDSPL        | Ctdspl        | 3.15    | 3.08    | 2.28    | 2.06    | 0.008261 | -1.42148 |
| Golga7        | Golga7        | 37.61   | 36.87   | 28.92   | 27.89   | 4.56E-06 | -1.42172 |
| Ube2b         | Ube2b         | 35.38   | 36.11   | 28.31   | 26.29   | 9.12E-05 | -1.4236  |
| CCNG1         | Ccng1         | 127.02  | 136.4   | 97.58   | 97.68   | 6.23E-08 | -1.42456 |
| Rab13         | Rab13         | 17.99   | 20.99   | 14.94   | 12.68   | 0.000225 | -1.4264  |
| MMD           | Mmd           | 38.68   | 36.74   | 29.85   | 28.47   | 0.000141 | -1.42734 |
| Dnajb5        | Dnajb5        | 5.05    | 4.62    | 3.45    | 3.57    | 0.025743 | -1.42834 |

| Gene-ID | Gene Symbol | MG33304 | MG33303 | MG33306 | MG33305 | q_value  | FC       |
|---------|-------------|---------|---------|---------|---------|----------|----------|
| RAP2B   | Rap2b       | 3.13    | 3.16    | 2.64    | 2.13    | 0.000895 | -1.43084 |
| FUS     | Fus         | 20.92   | 22.41   | 15.14   | 15.44   | 0.000217 | -1.43213 |
| PPFIA1  | Ppfia1      | 15.69   | 15.9    | 13.21   | 11.18   | 2.53E-05 | -1.43227 |
| TAF5L   | Taf5l       | 31.58   | 30.44   | 23.66   | 21.25   | 2.51E-06 | -1.43389 |
| Acaca   | Acaca       | 25.14   | 24.99   | 20.07   | 18.6    | 1.2E-08  | -1.43481 |
| Ppm1f   | Ppm1f       | 16.84   | 15.58   | 12.43   | 11.09   | 6.67E-07 | -1.43562 |
| MBNL1   | Mbnl1       | 40.27   | 40.97   | 30.47   | 29.56   | 7.23E-07 | -1.43594 |
| DPYSL2  | Dpysl2      | 45.56   | 40.57   | 34.07   | 28.66   | 7.66E-09 | -1.43686 |
| TOMM70A | Tomm70a     | 51.62   | 55.17   | 40.37   | 38.12   | 3.5E-07  | -1.43965 |
| DUSP3   | Dusp3       | 14.69   | 15.49   | 10.17   | 8.96    | 0.002024 | -1.43994 |
| Acap2   | Acap2       | 8.91    | 9.17    | 6.51    | 6.62    | 2.77E-07 | -1.44009 |
| Phf6    | Phf6        | 15.69   | 16.69   | 11.92   | 11.34   | 9.52E-08 | -1.4478  |
| SEC31A  | Sec31a      | 61.08   | 56.13   | 43.04   | 39.22   | 4.85E-08 | -1.4486  |
| CAV2    | Cav2        | 9.19    | 9.19    | 7.09    | 6.96    | 5.25E-05 | -1.44974 |
| VTI1A   | Vti1a       | 6.2     | 6.14    | 4.82    | 4.11    | 0.010138 | -1.44991 |
| Mpdz    | Mpdz        | 34.77   | 34.98   | 24.1    | 22.96   | 6.02E-08 | -1.45086 |
| NAV3    | Nav3        | 1.61    | 1.56    | 1       | 0.71    | 0.029423 | -1.45113 |
| DAG1    | Dag1        | 42.57   | 40.49   | 31.62   | 26.76   | 2.42E-08 | -1.45321 |
| BRMS1L  | Brms1l      | 11.54   | 13.14   | 9.45    | 8.47    | 5.1E-06  | -1.45371 |
| Tmem164 | Tmem164     | 11.98   | 11.31   | 8.73    | 8.04    | 1.26E-05 | -1.45698 |
| UBE2Q1  | Ube2q1      | 25.68   | 25.62   | 18.26   | 18.16   | 2.23E-08 | -1.45817 |
| SSFA2   | Ssfa2       | 11.56   | 10.81   | 8.17    | 7.49    | 1.86E-07 | -1.45855 |
| PRDX1   | Prdx1       | 455.19  | 486.15  | 341.27  | 348.52  | 2.78E-08 | -1.46153 |
| DKC1    | Dkc1        | 51.08   | 48.21   | 36.62   | 34.59   | 9.38E-07 | -1.46335 |
| AP1S2   | Ap1s2       | 9.52    | 9.96    | 7.55    | 7.59    | 0.000292 | -1.46561 |

| Gene-ID  | Gene Symbol | MG33304 | MG33303 | MG33306 | MG33305 | q_value  | FC       |
|----------|-------------|---------|---------|---------|---------|----------|----------|
| Ranbp10  | Ranbp10     | 7.77    | 7.64    | 5.65    | 5.32    | 4.87E-05 | -1.46603 |
| ARPC5    | Arpc5       | 50.08   | 52.04   | 38.66   | 38.7    | 9.64E-09 | -1.46775 |
| Scd2     | Scd2        | 264.6   | 253.65  | 201.68  | 169.61  | 2.05E-06 | -1.46781 |
| RAD23B   | Rad23b      | 102.11  | 96.54   | 70.84   | 67.25   | 8.56E-10 | -1.47109 |
| SNX19    | Snx19       | 18.45   | 17.59   | 12.93   | 12.28   | 7.21E-07 | -1.47473 |
| DSP      | Dsp         | 31.76   | 32.35   | 23.78   | 21.39   | 2.66E-08 | -1.47772 |
| DNAJA1   | Dnaja1      | 134.99  | 155.82  | 106.81  | 100.52  | 9.22E-07 | -1.4788  |
| ACO1     | Aco1        | 27.23   | 25.96   | 19.66   | 17.79   | 1.8E-09  | -1.47942 |
| Ank3     | Ank3        | 15.76   | 13.87   | 11.29   | 10.43   | 4.8E-06  | -1.48139 |
| Golim4   | Golim4      | 10.38   | 10.1    | 7.5     | 6.59    | 5.47E-06 | -1.48342 |
| Tmem120b | Tmem120b    | 4.52    | 4.55    | 3.07    | 3.51    | 0.011172 | -1.48653 |
| HIPK1    | Hipk1       | 12.26   | 11.86   | 8.87    | 8.24    | 3.55E-09 | -1.48802 |
| ZFX      | Zfx         | 18.16   | 17.74   | 13.24   | 15.02   | 9.64E-07 | -1.48833 |
| Zeb2     | Zeb2        | 20.41   | 21.14   | 12.98   | 11.9    | 4E-07    | -1.49063 |
| GOLPH3   | Golph3      | 55.92   | 52.92   | 39.26   | 37.79   | 2.13E-10 | -1.49182 |
| Sfxn1    | Sfxn1       | 26.15   | 27.38   | 19.13   | 18.41   | 2.76E-09 | -1.49586 |
| ELMOD2   | Elmod2      | 13.4    | 14.48   | 12.32   | 11.69   | 8.09E-07 | -1.49678 |
| Igsf3    | Igsf3       | 5.73    | 5.83    | 4.19    | 3.86    | 7.56E-06 | -1.49695 |
| STX2     | Stx2        | 10.35   | 9.94    | 7.71    | 6.47    | 8.37E-05 | -1.49742 |
| Bnc2     | Bnc2        | 4.29    | 4.4     | 3.04    | 2.81    | 0.006741 | -1.49817 |
| PGK1     | Pgk1        | 645.92  | 626.42  | 452.03  | 446.24  | 9E-08    | -1.49838 |
| N4bp2    | N4bp2       | 5.52    | 6.38    | 4.03    | 3.5     | 6.05E-05 | -1.49931 |
| SLC25A23 | Slc25a23    | 12.11   | 11.38   | 7.85    | 7.08    | 2.51E-06 | -1.50316 |
| CBX1     | Cbx1        | 33      | 35.8    | 25.33   | 22.46   | 1.01E-06 | -1.50532 |
| Vps33a   | Vps33a      | 18.8    | 17.59   | 12.84   | 12.11   | 2.65E-08 | -1.50873 |

| Gene-ID | Gene Symbol | MG33304 | MG33303 | MG33306 | MG33305 | q_value  | FC       |
|---------|-------------|---------|---------|---------|---------|----------|----------|
| Phc3    | Phc3        | 5.05    | 4.6     | 3.95    | 3.09    | 0.000006 | -1.50928 |
| CREBBP  | Crebbp      | 4.74    | 4.7     | 3.49    | 2.88    | 0.00001  | -1.51067 |
| ZMYM1   | Zmym1       | 10.03   | 9.53    | 8.41    | 6.47    | 0.046068 | -1.52363 |
| CLDN12  | Cldn12      | 21.29   | 23.21   | 15.71   | 15.29   | 3.24E-08 | -1.52401 |
| IDS     | Ids         | 3.82    | 3.5     | 2.25    | 2.68    | 5.63E-05 | -1.52622 |
| KDEL2   | Kdelr2      | 64.75   | 65.4    | 45.48   | 43.76   | 3.48E-11 | -1.52668 |
| LZTR1   | Lztr1       | 82.72   | 77.2    | 98.76   | 80.31   | 7.67E-07 | -1.5273  |
| RAB12   | Rab12       | 26.43   | 28.14   | 19.69   | 17.97   | 4.39E-09 | -1.52783 |
| Mxd4    | Mxd4        | 18.1    | 18.44   | 11.7    | 11.23   | 9.47E-06 | -1.52951 |
| EIF4A2  | Eif4a2      | 89.6    | 104.93  | 69.19   | 71.57   | 2.14E-07 | -1.53    |
| RCHY1   | Rchy1       | 18.9    | 17.89   | 12.74   | 11.66   | 6.2E-07  | -1.53033 |
| LHFP    | Lhfp        | 50.46   | 50.09   | 34.01   | 34.63   | 3.74E-11 | -1.53098 |
| Gjc1    | Gjc1        | 18.18   | 20.33   | 13.15   | 12.16   | 1.99E-05 | -1.53132 |
| CPD     | Cpd         | 25.39   | 25.74   | 18.23   | 16.95   | 5.96E-12 | -1.53201 |
| Tmem41b | Tmem41b     | 66.74   | 76.59   | 50.51   | 51.98   | 2.24E-10 | -1.5325  |
| Gucy1a3 | Gucy1a3     | 102.99  | 111.5   | 75.01   | 70.41   | 5.29E-11 | -1.53287 |
| SSH1    | Ssh1        | 1.68    | 1.35    | 1.06    | 0.8     | 0.041712 | -1.53321 |
| Atrx    | Atrx        | 47.38   | 56.08   | 33.91   | 37.59   | 3.32E-08 | -1.53672 |
| Ednra   | Ednra       | 6.53    | 6.98    | 4.56    | 4.42    | 1.69E-06 | -1.53749 |
| ARNT    | Arnt        | 11.15   | 11.41   | 9.24    | 8.19    | 0.000274 | -1.53763 |
| SHCBP1  | Shcbp1      | 24.7    | 28.15   | 19.06   | 17.7    | 1.72E-09 | -1.53828 |
| Amotl2  | Amotl2      | 18.91   | 15.15   | 11.52   | 10.25   | 3.03E-09 | -1.54011 |
| Rlf     | Rlf         | 11.38   | 12.75   | 8.22    | 7.88    | 5.89E-09 | -1.54488 |
| Plaa    | Plaa        | 52.82   | 58.28   | 38.96   | 37.61   | 6.54E-11 | -1.54619 |
| IRAK1   | Irak1       | 14.14   | 12.83   | 10.9    | 9.36    | 1.07E-05 | -1.54935 |



| Gene-ID       | Gene Symbol   | MG33304 | MG33303 | MG33306 | MG33305 | q_value  | FC       |
|---------------|---------------|---------|---------|---------|---------|----------|----------|
| GCLM          | Gclm          | 21.05   | 20.78   | 13.71   | 12.16   | 0.03359  | -1.55043 |
| SLC6A9        | Slc6a9        | 6.75    | 4.78    | 5.22    | 3.47    | 0.000544 | -1.55151 |
| Cggbp1        | Cggbp1        | 42.14   | 40.7    | 28.87   | 28.74   | 1.41E-10 | -1.55248 |
| Glis2         | Glis2         | 6.78    | 6.57    | 4.73    | 4.28    | 0.002359 | -1.55286 |
| SLC30A7       | Slc30a7       | 5.75    | 5.75    | 4.05    | 3.65    | 4.23E-08 | -1.5532  |
| Hccs          | Hccs          | 33.45   | 33.6    | 24.01   | 22.21   | 1.98E-07 | -1.5542  |
| Klf9          | Klf9          | 16.28   | 17.56   | 11.1    | 11.4    | 2.49E-07 | -1.55551 |
| Plk2          | Plk2          | 14.37   | 14.33   | 9.49    | 9.54    | 9.79E-09 | -1.55582 |
| EVI5          | Evi5          | 23.71   | 25.44   | 16.85   | 17.34   | 5E-10    | -1.55764 |
| PALLD         | Palld         | 4.47    | 4.93    | 3.42    | 3.1     | 0.00028  | -1.55879 |
| Zfp292        | Zfp292        | 12.02   | 15.12   | 9.11    | 9       | 7.83E-12 | -1.56228 |
| DCTN3         | Dctn3         | 70.1    | 63.5    | 47.12   | 43.32   | 5.48E-10 | -1.56362 |
| PPP6C         | Ppp6c         | 18.47   | 20.3    | 12.12   | 11.1    | 2.33E-07 | -1.56861 |
| KLHL15        | Klhl15        | 5.33    | 4.48    | 3.94    | 3.19    | 0.004461 | -1.57161 |
| Mecp2         | Mecp2         | 11.43   | 11.05   | 7.89    | 7.38    | 7.47E-10 | -1.5729  |
| NFIX          | Nfix          | 8.34    | 7.36    | 5.07    | 4.23    | 0.000885 | -1.57421 |
| CMPK1         | Cmpk1         | 32.77   | 36.81   | 24.4    | 22.88   | 5.31E-12 | -1.57545 |
| PIK3C2A       | Pik3c2a       | 16.42   | 19.09   | 11.59   | 12.01   | 1.07E-11 | -1.57875 |
| 4931406P16Rik | 4931406P16Rik | 33.74   | 31.06   | 21.13   | 19.32   | 2.74E-10 | -1.58103 |
| LPP           | Lpp           | 9.71    | 10.3    | 6.88    | 6.2     | 1.52E-05 | -1.58565 |
| UBE2E1        | Ube2e1        | 7.91    | 6.98    | 4.99    | 5.23    | 0.016212 | -1.58698 |
| Ripk2         | Ripk2         | 12.39   | 12.95   | 8.44    | 7.89    | 9.73E-07 | -1.58755 |
| Crybg3        | Crybg3        | 16.36   | 17.34   | 11.21   | 11.42   | 1.97E-12 | -1.58786 |
| EIF4EBP2      | Eif4ebp2      | 6.47    | 5.53    | 4.48    | 3.61    | 2.08E-08 | -1.58925 |
| 2700081O15Rik | 2700081O15Rik | 8.13    | 9.19    | 6.39    | 5.64    | 0.000673 | -1.58947 |

| Gene-ID       | Gene Symbol   | MG33304 | MG33303 | MG33306 | MG33305 | q_value  | FC       |
|---------------|---------------|---------|---------|---------|---------|----------|----------|
| TOMM20        | Tomm20        | 110.82  | 108.75  | 69.45   | 67.5    | 7.59E-11 | -1.59041 |
| SRP72         | Srp72         | 33.01   | 32.66   | 22.86   | 21.7    | 8.33E-13 | -1.59054 |
| SLC7A5        | Slc7a5        | 70.04   | 59.14   | 45.53   | 38.34   | 6.13E-14 | -1.59237 |
| UBE2A         | Ube2a         | 9.89    | 10.89   | 7.52    | 6.57    | 2.44E-06 | -1.59456 |
| Zmym4         | Zmym4         | 12.23   | 13.63   | 8.4     | 8.24    | 3.42E-06 | -1.59559 |
| Pi4kb         | Pi4kb         | 18.16   | 15.59   | 11.91   | 10.18   | 5.5E-08  | -1.59945 |
| Slc35a2       | Slc35a2       | 13.62   | 11.88   | 8.46    | 7.82    | 0.000473 | -1.60064 |
| AMMECR1L      | Ammecr1l      | 6.05    | 5.49    | 4       | 3.64    | 2.59E-05 | -1.60141 |
| ATP6V1A       | Atp6v1a       | 47.32   | 47.26   | 32.61   | 29.7    | 4.14E-13 | -1.60218 |
| GALNT2        | Galnt2        | 98.45   | 99.94   | 68.39   | 62.24   | 2.39E-13 | -1.60273 |
| EGLN1         | Egln1         | 42.02   | 37.03   | 27.32   | 24.24   | 3.07E-06 | -1.60433 |
| BACH1         | Bach1         | 6.08    | 6.4     | 4.29    | 3.78    | 3.91E-07 | -1.60483 |
| Trim2         | Trim2         | 20.83   | 21.83   | 13.7    | 13.54   | 4.85E-09 | -1.60619 |
| Arl8b         | Arl8b         | 38.71   | 41.91   | 26.35   | 26.23   | 8.39E-14 | -1.60826 |
| GCA           | Gca           | 7.6     | 11.1    | 7.07    | 5.27    | 4.79E-06 | -1.61074 |
| Irs1          | Irs1          | 3.98    | 3.52    | 2.74    | 2.48    | 8.44E-08 | -1.61435 |
| A830080D01Rik | A830080D01Rik | 6.55    | 6.85    | 5.25    | 3.75    | 0.000132 | -1.61547 |
| Mmgt1         | Mmgt1         | 25.62   | 28.08   | 17.22   | 17.92   | 5.22E-14 | -1.6161  |
| TFG           | Tfg           | 40.2    | 38.78   | 25.43   | 25.15   | 1.56E-11 | -1.61817 |
| XIAP          | Xiap          | 7.43    | 8.47    | 5.55    | 5.29    | 9.73E-09 | -1.6186  |
| Twistnb       | Twistnb       | 38.83   | 43.53   | 27.58   | 26.08   | 4.93E-11 | -1.6193  |
| Sh3pxd2a      | Sh3pxd2a      | 7.33    | 6.89    | 4.63    | 4.38    | 2.51E-09 | -1.61991 |
| RAB31         | Rab31         | 35.73   | 35.24   | 23.37   | 22.86   | 1.96E-14 | -1.62097 |
| TMEM9         | Tmem9         | 39.84   | 37.12   | 24.88   | 24.21   | 2.69E-10 | -1.62282 |
| RAP2C         | Rap2c         | 7.64    | 7.92    | 5.33    | 4.98    | 3.89E-06 | -1.6231  |

| Gene-ID | Gene Symbol | MG33304 | MG33303 | MG33306 | MG33305 | q_value  | FC       |
|---------|-------------|---------|---------|---------|---------|----------|----------|
| GALC    | Galc        | 5.01    | 4.56    | 3.41    | 3.04    | 5.88E-07 | -1.62367 |
| IMPAD1  | Impad1      | 31.65   | 33.67   | 22.66   | 20.94   | 4.81E-11 | -1.62448 |
| SCHIP1  | Schip1      | 26.25   | 25.75   | 16.49   | 16.6    | 6.22E-10 | -1.6253  |
| TOMM5   | Tomm5       | 141.74  | 151.53  | 96.69   | 92.81   | 1.5E-11  | -1.63273 |
| FNIP1   | Fnip1       | 14.33   | 17.15   | 10.3    | 10.16   | 5.33E-13 | -1.63562 |
| Plekhm3 | Plekhm3     | 2.39    | 2.63    | 1.49    | 1.89    | 0.005431 | -1.6357  |
| ERRFI1  | Errfi1      | 3.94    | 3.49    | 2.55    | 2.17    | 3.41E-05 | -1.63597 |
| Mex3a   | Mex3a       | 3.6     | 3.57    | 2.34    | 2.11    | 7.18E-05 | -1.63658 |
| PAICS   | Paics       | 117.49  | 118.88  | 76.48   | 73.25   | 5.24E-11 | -1.64039 |
| SLC19A2 | Slc19a2     | 21.57   | 21.29   | 14.93   | 13.32   | 2.54E-12 | -1.64701 |
| Prkacb  | Prkacb      | 17.79   | 16.58   | 11.9    | 10.44   | 2.43E-13 | -1.64979 |
| Csrp2   | Csrp2       | 167.97  | 177.96  | 109.23  | 110.02  | 0        | -1.65002 |
| SPRED2  | Spred2      | 2.13    | 1.71    | 1.34    | 1.21    | 0.042252 | -1.65251 |
| Nr2f2   | Nr2f2       | 9.74    | 9.19    | 5.54    | 5.08    | 1.06E-05 | -1.65301 |
| TRAPPC2 | Trappc2     | 12.5    | 12.4    | 7.82    | 8.42    | 1.31E-05 | -1.65854 |
| Plxna4  | Plxna4      | 1.68    | 1.62    | 1.57    | 1.46    | 0.000223 | -1.66056 |
| RAB35   | Rab35       | 25.26   | 22.67   | 15.88   | 13.71   | 1.2E-12  | -1.66082 |
| ERI3    | Eri3        | 37.47   | 35.56   | 22.12   | 21.64   | 4.5E-09  | -1.67369 |
| LDLR    | Ldlr        | 40.2    | 35.42   | 25.02   | 22.04   | 0        | -1.67446 |
| JUN     | Jun         | 2.03    | 1.34    | 1.01    | 1.01    | 0.005807 | -1.67589 |
| RUFY2   | Rufy2       | 5.66    | 6.13    | 4.08    | 3.85    | 0.000618 | -1.6764  |
| LAMP2   | Lamp2       | 103.98  | 108.62  | 66.13   | 66.29   | 1.02E-11 | -1.67751 |
| CYTH3   | Cyth3       | 19.8    | 19.03   | 12.07   | 11.61   | 2.73E-13 | -1.67915 |
| Ikzf2   | Ikzf2       | 1.1     | 1.2     | 0.69    | 0.72    | 0.001823 | -1.68979 |
| Cdk16   | Cdk16       | 35.29   | 33.88   | 23.01   | 21.72   | 3.84E-14 | -1.69075 |

| Gene-ID | Gene Symbol | MG33304 | MG33303 | MG33306 | MG33305 | q_value  | FC       |
|---------|-------------|---------|---------|---------|---------|----------|----------|
| Mkl2    | Mkl2        | 6.06    | 6.01    | 3.86    | 3.62    | 5.48E-07 | -1.69218 |
| Naa50   | Naa50       | 33.33   | 33.99   | 21.61   | 20.84   | 4.6E-13  | -1.69494 |
| Frmd4a  | Frmd4a      | 4.51    | 4.72    | 2.62    | 2.18    | 2.74E-05 | -1.6966  |
| IKBIP   | Ikbip       | 21.45   | 22.52   | 12.85   | 14.54   | 2.97E-07 | -1.69899 |
| CDR2    | Cdr2        | 15.65   | 15.82   | 9.77    | 9.32    | 5.38E-12 | -1.70075 |
| STAG2   | Stag2       | 46.3    | 54.01   | 31.89   | 31.82   | 5.11E-15 | -1.70334 |
| Dmd     | Dmd         | 7.78    | 9.14    | 4.81    | 4.19    | 3.64E-05 | -1.70396 |
| Hspa13  | Hspa13      | 11.5    | 12.05   | 7.49    | 7.69    | 8.53E-11 | -1.70417 |
| GSPT1   | Gspt1       | 41.69   | 42.6    | 27.61   | 25.77   | 1.61E-13 | -1.7067  |
| STAT5B  | Stat5b      | 11.09   | 10.45   | 6.5     | 6.5     | 5.52E-11 | -1.70987 |
| Psip1   | Psip1       | 87.53   | 96.23   | 55.42   | 55.32   | 7.25E-12 | -1.7109  |
| Itpr1   | Itpr1       | 28.67   | 28.79   | 18.38   | 16.61   | 0        | -1.71192 |
| Rab21   | Rab21       | 35.76   | 34.02   | 17.19   | 15.04   | 0.000493 | -1.71228 |
| Acp1    | Acp1        | 95.3    | 100.97  | 59.48   | 59.12   | 3.84E-14 | -1.71339 |
| Apoo    | Apoo        | 76.49   | 84.97   | 53.07   | 53.84   | 9.77E-14 | -1.71469 |
| Ndst1   | Ndst1       | 23.36   | 21.15   | 14.5    | 12.3    | 5.86E-08 | -1.71634 |
| POLA1   | Pola1       | 41.46   | 45.01   | 32.43   | 30.51   | 0        | -1.71639 |
| DLG1    | Dlg1        | 32.41   | 33.37   | 23.17   | 25.73   | 1.29E-13 | -1.71747 |
| ZBTB33  | Zbtb33      | 8.39    | 9.24    | 5.42    | 5.05    | 7.72E-09 | -1.7286  |
| KDM5B   | Kdm5b       | 6.55    | 6.41    | 4.21    | 3.98    | 2.86E-11 | -1.72932 |
| Lats2   | Lats2       | 6.67    | 5.83    | 3.78    | 3.28    | 1.97E-07 | -1.73043 |
| ZMIZ1   | Zmiz1       | 10.76   | 9.77    | 6.62    | 5.83    | 1.86E-11 | -1.73058 |
| Vbp1    | Vbp1        | 67.95   | 75.95   | 43.8    | 45.05   | 0        | -1.73124 |
| Zfp532  | Zfp532      | 7.66    | 6.29    | 4.24    | 3.67    | 1.12E-05 | -1.73171 |
| VCL     | Vcl         | 126.18  | 123.17  | 78.02   | 71.58   | 1.66E-11 | -1.74043 |

| Gene-ID  | Gene Symbol | MG33304 | MG33303 | MG33306 | MG33305 | q_value  | FC       |
|----------|-------------|---------|---------|---------|---------|----------|----------|
| IFIT2    | Ifit2       | 11.51   | 14.09   | 7.05    | 7.64    | 1.64E-11 | -1.75064 |
| Setd7    | Setd7       | 19.95   | 21.89   | 12.93   | 11.91   | 0        | -1.7511  |
| Ckap4    | Ckap4       | 33.09   | 31.33   | 19.45   | 17.94   | 0        | -1.75975 |
| Heatr5a  | Heatr5a     | 10.61   | 11.03   | 6.66    | 6.16    | 5.22E-14 | -1.76253 |
| Trim62   | Trim62      | 0.94    | 0.69    | 0.54    | 0.39    | 0.03871  | -1.76904 |
| AGPAT9   | Agpat9      | 11.77   | 12.28   | 7.43    | 7.09    | 5.67E-09 | -1.77136 |
| WDR1     | Wdr1        | 154.09  | 147.22  | 89.39   | 85.21   | 0        | -1.77585 |
| INPP5B   | Inpp5b      | 12.02   | 11.85   | 7.75    | 7.04    | 9.61E-10 | -1.77643 |
| CAV1     | Cav1        | 60.28   | 58.51   | 34.47   | 33.86   | 0        | -1.79023 |
| BC030336 | BC030336    | 9.09    | 9.23    | 6.4     | 6.46    | 1.92E-05 | -1.79306 |
| INSIG1   | Insig1      | 166.65  | 179.17  | 104.57  | 98.63   | 0        | -1.79329 |
| SPIN4    | Spin4       | 2.32    | 2.45    | 1.49    | 1.36    | 1.41E-06 | -1.79965 |
| SMC1A    | Smc1a       | 63.69   | 71.73   | 37.26   | 39.48   | 0        | -1.8184  |
| SLC36A1  | Slc36a1     | 4.49    | 4.77    | 2.78    | 2.39    | 3.9E-08  | -1.82    |
| SORT1    | Sort1       | 49.88   | 51.69   | 29.61   | 27.84   | 0        | -1.82339 |
| Arcn1    | Arcn1       | 112.53  | 118.83  | 70.52   | 64.3    | 0        | -1.82662 |
| Tln1     | Tln1        | 39.34   | 35.31   | 22.84   | 21.15   | 0        | -1.84005 |
| OAT      | Oat         | 179.93  | 173.72  | 101.65  | 98.84   | 0        | -1.84154 |
| Ppp1r12b | Ppp1r12b    | 32.21   | 30.99   | 18.82   | 17.08   | 0        | -1.84404 |
| SPG20    | Spg20       | 27.73   | 29.99   | 16.59   | 16.08   | 0        | -1.84598 |
| Tsc22d1  | Tsc22d1     | 118.64  | 112.45  | 65.37   | 63.94   | 0        | -1.85556 |
| MORC4    | Morc4       | 12.05   | 12.14   | 7.47    | 6.92    | 6.42E-13 | -1.85675 |
| HSP90AB1 | Hsp90ab1    | 257.88  | 246.79  | 145.76  | 131.05  | 0        | -1.87936 |
| COL4A5   | Col4a5      | 61.15   | 60.3    | 33.78   | 32.46   | 0        | -1.88061 |
| DENND4C  | Dennd4c     | 13.43   | 14.22   | 8.75    | 8.28    | 0        | -1.88198 |

| Gene-ID | Gene Symbol | MG33304 | MG33303 | MG33306 | MG33305 | q_value  | FC       |
|---------|-------------|---------|---------|---------|---------|----------|----------|
| PITPNA  | Pitpna      | 55.09   | 57.68   | 32.67   | 30.91   | 0        | -1.90704 |
| Snx30   | Snx30       | 9.07    | 9.01    | 5       | 4.9     | 0        | -1.90797 |
| CCDC112 | Ccdc112     | 2.01    | 2.36    | 1.26    | 1.12    | 2.48E-05 | -1.9158  |
| ZYG11B  | Zyg11b      | 14.42   | 15.63   | 8.24    | 8.24    | 0        | -1.91817 |
| ANKRD52 | Ankrd52     | 5.94    | 5.36    | 3.33    | 3.18    | 3.41E-13 | -1.9197  |
| CCDC50  | Ccdc50      | 24.36   | 27.48   | 16.06   | 16.46   | 0        | -1.92339 |
| SLC44A1 | Slc44a1     | 12.53   | 13.64   | 7.36    | 6.85    | 1.4E-12  | -1.95433 |
| Mospd2  | Mospd2      | 16.18   | 17.92   | 9.53    | 9.4     | 6.83E-13 | -1.95638 |
| Tmeff2  | Tmeff2      | 3.16    | 2.93    | 1.29    | 1.68    | 6.66E-07 | -1.95828 |
| NDRG1   | Ndrgr1      | 8.32    | 7.23    | 4.03    | 3.96    | 1.04E-12 | -1.9659  |
| KLHL29  | Klhl29      | 4.25    | 3.83    | 2.31    | 1.92    | 4.72E-13 | -1.96929 |
| MGST3   | Mgst3       | 35      | 32.01   | 18.06   | 16.83   | 0        | -1.9713  |
| Snx13   | Snx13       | 38.87   | 44.87   | 22.39   | 21.49   | 0        | -2.00464 |
| TMEM64  | Tmem64      | 15.34   | 14.72   | 8.23    | 7.86    | 0        | -2.00562 |
| ANKIB1  | Ankib1      | 27.42   | 27.76   | 14.73   | 14.08   | 0        | -2.01475 |
| Pard3b  | Pard3b      | 10.97   | 12.01   | 6.08    | 6.25    | 0        | -2.02054 |
| TRAM2   | Tram2       | 2.99    | 2.79    | 1.16    | 0.99    | 0.00041  | -2.02362 |
| RUSC2   | Rusc2       | 7.51    | 6.68    | 3.55    | 3.59    | 1.86E-11 | -2.03535 |
| Dcun1d4 | Dcun1d4     | 6.95    | 6.58    | 3.55    | 3.75    | 4.09E-12 | -2.04128 |
| SCARB2  | Scarb2      | 207.52  | 220.65  | 109.97  | 103.41  | 0        | -2.07525 |
| RHOB    | Rhob        | 75.82   | 64.36   | 35.96   | 33.73   | 0        | -2.08137 |
| TUFT1   | Tuft1       | 5.19    | 5.25    | 2.62    | 2.93    | 1.95E-08 | -2.08159 |
| PRELID2 | Prelid2     | 6.29    | 6.75    | 3.39    | 3.06    | 0.003366 | -2.08293 |
| NCEH1   | Nceh1       | 68.8    | 77.29   | 37.15   | 35.86   | 0        | -2.08947 |
| Gpr173  | Gpr173      | 3.38    | 3.05    | 2.15    | 1.89    | 0.000193 | -2.09985 |

| Gene-ID  | Gene Symbol | MG33304 | MG33303 | MG33306 | MG33305 | q_value  | FC       |
|----------|-------------|---------|---------|---------|---------|----------|----------|
| Pik3cb   | Pik3cb      | 6.91    | 7.05    | 3.64    | 3.36    | 5.11E-15 | -2.11808 |
| MARCKSL1 | Marcksl1    | 73.68   | 67.11   | 34.39   | 33.05   | 0        | -2.11902 |
| GNPNAT1  | Gnpnat1     | 5.82    | 6.94    | 3.52    | 3.1     | 0.000205 | -2.15141 |
| Atp11c   | Atp11c      | 10.91   | 13.17   | 6.13    | 5.91    | 3.83E-10 | -2.15405 |
| HYOU1    | Hyou1       | 240.27  | 217.74  | 114.26  | 100.75  | 0        | -2.15651 |
| ARHGEF3  | Arhgef3     | 2.59    | 2.78    | 1.32    | 1.15    | 8.23E-07 | -2.16115 |
| CDC16    | Cdc16       | 38.45   | 38.82   | 18.98   | 18.24   | 0        | -2.18035 |
| PLOD2    | Plod2       | 62.71   | 64.59   | 30.71   | 32.23   | 0        | -2.18216 |
| Kctd10   | Kctd10      | 67.33   | 62.02   | 31.36   | 30.15   | 0        | -2.19595 |
| Arhgap6  | Arhgap6     | 4.59    | 4.6     | 2.19    | 2.2     | 2.19E-10 | -2.21123 |
| CREB3L2  | Creb3l2     | 11.32   | 9.88    | 5.04    | 4.34    | 0        | -2.21712 |
| Prkca    | Prkca       | 14.53   | 13.29   | 6.74    | 6.24    | 0        | -2.22281 |
| Brwd3    | Brwd3       | 2.72    | 3.17    | 1.51    | 1.31    | 2.51E-11 | -2.23024 |
| NFIB     | Nfib        | 42.19   | 44.53   | 22.02   | 19.28   | 0        | -2.25203 |
| CUL4B    | Cul4b       | 39.96   | 43.25   | 20.29   | 19.48   | 0        | -2.26224 |
| Rab21    | Rab21       | 35.76   | 34.02   | 17.19   | 15.04   | 0        | -2.27635 |
| PRMT6    | Prmt6       | 7.85    | 7.87    | 3.53    | 3.6     | 4.47E-13 | -2.29214 |
| SWAP70   | Swap70      | 23.33   | 21.95   | 10.71   | 9.86    | 0        | -2.31066 |
| Prkg1    | Prkg1       | 14.86   | 14.53   | 11.86   | 10.12   | 1.74E-11 | -2.31209 |
| SPATS2L  | Spats2l     | 9.5     | 9.92    | 3.59    | 4.36    | 3.47E-11 | -2.34991 |
| FOXC1    | Foxc1       | 1.3     | 1.07    | 0.62    | 0.47    | 0.00021  | -2.35297 |
| DCBLD2   | Dcbld2      | 47.45   | 48.7    | 23.79   | 22.85   | 0        | -2.3683  |
| Pak3     | Pak3        | 6.16    | 6.13    | 2.48    | 2.11    | 2.05E-07 | -2.36897 |
| ZFH3     | Zfhx3       | 4.08    | 3.99    | 1.82    | 1.65    | 0        | -2.37265 |
| ADCY9    | Adcy9       | 2.01    | 1.84    | 0.96    | 0.95    | 4.01E-06 | -2.38993 |

| Gene-ID   | Gene Symbol | MG33304 | MG33303 | MG33306 | MG33305 | q_value  | FC       |
|-----------|-------------|---------|---------|---------|---------|----------|----------|
| POLE3     | Pole3       | 27.77   | 28.99   | 10.65   | 10.04   | 1.78E-12 | -2.41257 |
| STX17     | Stx17       | 8.94    | 9.91    | 4.31    | 3.99    | 5.69E-14 | -2.41619 |
| Slc30a4   | Slc30a4     | 17.34   | 18.84   | 8.25    | 7.59    | 0        | -2.41631 |
| Fhod1     | Fhod1       | 6.27    | 5.87    | 3.58    | 2.59    | 0        | -2.46414 |
| Nuak1     | Nuak1       | 5.11    | 4.55    | 1.98    | 1.79    | 3.84E-14 | -2.49591 |
| Rgl1      | Rgl1        | 14.4    | 13.83   | 6.23    | 5.58    | 0        | -2.49685 |
| UBASH3B   | Ubash3b     | 3.21    | 2.49    | 1.44    | 0.99    | 1.73E-08 | -2.52443 |
| Akt3      | Akt3        | 8.69    | 10.55   | 3.55    | 3.53    | 0        | -2.53254 |
| Fam120c   | Fam120c     | 3.42    | 3.41    | 1.58    | 1.44    | 0        | -2.53544 |
| Cadm1     | Cadm1       | 11.88   | 10.99   | 5.75    | 4.4     | 0        | -2.55293 |
| Fgd1      | Fgd1        | 10.5    | 8.82    | 4.32    | 3.79    | 0        | -2.55359 |
| Nrip1     | Nrip1       | 3.14    | 3.62    | 1.52    | 1.3     | 7.85E-12 | -2.5689  |
| RAB11FIP1 | Rab11fip1   | 11.43   | 10.32   | 4.43    | 4.1     | 0        | -2.64192 |
| CNN3      | Cnn3        | 124.81  | 118     | 48.86   | 45.21   | 0        | -2.66303 |
| Pfn2      | Pfn2        | 37.29   | 36.47   | 14.83   | 14.85   | 0        | -2.66453 |
| EIF5A2    | Eif5a2      | 18.22   | 20.32   | 8.09    | 7.44    | 0        | -2.67225 |
| Klf3      | Klf3        | 3.95    | 3.37    | 1.51    | 1.4     | 8.26E-13 | -2.68352 |
| Rps6ka3   | Rps6ka3     | 11.29   | 11.46   | 4.91    | 4.5     | 0        | -2.71827 |
| LRRC58    | Lrrc58      | 14.7    | 14.27   | 6.33    | 5.42    | 0        | -2.72137 |
| Zfp704    | Zfp704      | 2.76    | 2.88    | 1.16    | 0.95    | 0        | -2.73114 |
| Mtss1l    | Mtss1l      | 4.01    | 3.7     | 1.69    | 1.25    | 1.16E-10 | -2.75063 |
| LIMA1     | Lima1       | 11.24   | 11.2    | 4.38    | 3.94    | 0        | -2.75722 |
| Gem       | Gem         | 8.82    | 9.48    | 2.92    | 3.69    | 0        | -2.84983 |
| DUSP6     | Dusp6       | 7.74    | 6.84    | 3.06    | 2.4     | 0        | -2.877   |
| Efna1     | Efna1       | 14.96   | 15.39   | 5.59    | 5.07    | 0        | -2.88808 |



| Gene-ID  | Gene Symbol | MG33304 | MG33303 | MG33306 | MG33305 | q_value  | FC       |
|----------|-------------|---------|---------|---------|---------|----------|----------|
| TM4SF1   | Tm4sf1      | 13.66   | 12.6    | 4.53    | 5.05    | 0        | -2.94195 |
| Nrp2     | Nrp2        | 49.35   | 49.03   | 17.63   | 16.25   | 0        | -3.03079 |
| Xkr4     | Xkr4        | 0.48    | 0.61    | 0.24    | 0.19    | 0.002415 | -3.09353 |
| SRPX     | Srpx        | 11.51   | 10.13   | 3.33    | 3.76    | 0        | -3.18586 |
| Frmd4b   | Frmd4b      | 2.4     | 2.1     | 1.01    | 1.75    | 1.05E-06 | -3.19252 |
| Slc4a4   | Slc4a4      | 16.48   | 15.76   | 5.54    | 4.65    | 0        | -3.27047 |
| PLS3     | Pls3        | 26.38   | 27.43   | 8.17    | 8.01    | 0        | -3.44485 |
| PSD3     | Psd3        | 8.72    | 9.77    | 7.73    | 6.86    | 0.023699 | -3.45772 |
| ABCA1    | Abca1       | 36.71   | 35.49   | 11.15   | 10.21   | 0        | -3.63669 |
| Plcl1    | Plcl1       | 1.46    | 1.4     | 0.42    | 0.43    | 2.27E-11 | -3.64586 |
| MAMLD1   | Mamld1      | 2.48    | 2.23    | 0.78    | 0.53    | 1.91E-09 | -3.7578  |
| FSTL1    | Fstl1       | 257.3   | 257.88  | 72.93   | 72.18   | 0        | -3.79234 |
| SERPINE1 | Serpine1    | 7.24    | 6.13    | 2       | 1.59    | 0        | -3.92088 |
| DLG5     | Dlg5        | 6.77    | 6.38    | 1.85    | 1.02    | 0        | -4.0172  |
| Prkar2b  | Prkar2b     | 5.41    | 6.05    | 1.44    | 1.45    | 0        | -4.05181 |
| LPAR1    | Lpar1       | 4.77    | 4.45    | 1.25    | 0.98    | 0        | -4.12137 |
| ETV5     | Etv5        | 8.18    | 7.12    | 1.99    | 1.81    | 0        | -4.1448  |
| Col4a3   | Col4a3      | 22.91   | 23.71   | 6       | 5.02    | 0        | -4.33234 |
| Fam107b  | Fam107b     | 12.99   | 14.14   | 3.13    | 3.35    | 0        | -4.37158 |
| CLTA     | Clta        | 221.41  | 208.5   | 52.57   | 48.56   | 0        | -4.40659 |
| HS3ST3B1 | Hs3st3b1    | 3.84    | 3.4     | 0.94    | 0.81    | 0        | -4.44233 |
| Nxph1    | Nxph1       | 2.25    | 2.5     | 0.64    | 0.51    | 4.04E-07 | -4.60035 |
| RUNX1    | Runx1       | 5.33    | 5.11    | 1.24    | 1.01    | 0        | -4.89122 |
| Mras     | Mras        | 7.55    | 8.11    | 1.61    | 1.87    | 0        | -4.98725 |
| Cyp1b1   | Cyp1b1      | 1.03    | 1.2     | 0.21    | 0.18    | 2.38E-10 | -5.18351 |

| Gene-ID  | Gene Symbol | MG33304 | MG33303 | MG33306 | MG33305 | q_value  | FC       |
|----------|-------------|---------|---------|---------|---------|----------|----------|
| KDR      | Kdr         | 2.67    | 2.57    | 0.53    | 0.53    | 0        | -5.20678 |
| Hs3st1   | Hs3st1      | 3.23    | 2.87    | 0.29    | 0.37    | 0        | -5.50743 |
| SMARCA1  | Smarca1     | 7.53    | 8.33    | 1.14    | 1.6     | 0        | -5.68076 |
| Ppap2b   | Ppap2b      | 22.11   | 20.83   | 4.17    | 3.57    | 0        | -5.79803 |
| CDK5R1   | Cdk5r1      | 10.35   | 8.94    | 1.75    | 1.74    | 0        | -5.80345 |
| Rasgef1b | Rasgef1b    | 11.89   | 12.37   | 2.42    | 2       | 0        | -5.99168 |
| ADM      | Adm         | 142.69  | 133.88  | 22.8    | 21.43   | 0        | -6.421   |
| IGFBP4   | Igfbp4      | 53.38   | 48.95   | 10.1    | 9.4     | 0        | -7.78608 |
| Reck     | Reck        | 6.19    | 5.09    | 0.78    | 0.71    | 0        | -8.12236 |
| Inhba    | Inhba       | 8.38    | 7.82    | 0.9     | 1.08    | 0        | -8.91328 |
| ANXA1    | Anxa1       | 0.67    | 0.73    | 0.3     | 0.11    | 0.000566 | -9.22248 |
| Kank1    | Kank1       | 2.87    | 2.73    | 0.32    | 0.37    | 0        | -10.5403 |
| MYOF     | Myof        | 5.7     | 5.39    | 0.58    | 0.5     | 0        | -10.6167 |
| Rims3    | Rims3       | 1.01    | 0.83    | 0.09    | 0.08    | 1.02E-13 | -10.6999 |
| PEG10    | Peg10       | 11.18   | 9.84    | 1.15    | 1.08    | 0        | -10.9477 |
| THBS1    | Thbs1       | 0.64    | 0.56    | 0.06    | 0.05    | 2.99E-10 | -17.8662 |
| Adamts8  | Adamts8     | 13.8    | 11.29   | 0.61    | 0.33    | 0        | -28.3337 |
| Fat3     | Fat3        | 3.46    | 3.48    | 0.11    | 0.13    | 0        | -29.2762 |
| PMEPA1   | Pmepa1      | 4.79    | 4.95    | 0.13    | 0.06    | 3.03E-08 | -388.792 |

**Supplementary Table 2. miR-200 family highly influence focal adhesion pathway.** Pathways analysis of miR-200 family targets genes showed a remarkable influence of miR-200 family to the focal adhesion pathway.

| p-value  | q-value  | pathway              | source   | external_id  | members_input_overlap                                                                                                                                                                                                                                                 | members_input_overlap_geneids                                                                                                                                                                                                                                                                                                                                 | size | effective_size |
|----------|----------|----------------------|----------|--------------|-----------------------------------------------------------------------------------------------------------------------------------------------------------------------------------------------------------------------------------------------------------------------|---------------------------------------------------------------------------------------------------------------------------------------------------------------------------------------------------------------------------------------------------------------------------------------------------------------------------------------------------------------|------|----------------|
| 2,51E-10 | 8,42E-09 | Membrane Trafficking | Reactome | R-HSA-199991 | CTTN; PUM1; DENND5A;<br>PRKAG2; CPD; KIF26B;<br>AKT3; CLTA; AP1S2;<br>AP1S3; DCTN3; CHMP5;<br>RAB8B; RAB35; SEC23A;<br>RAB31; STAM2;<br>YWHAQ; PPP6C;<br>SEC31A; RABEP1;<br>RAB13; RAB12;<br>DENND4C; RAB5B;<br>ARPC5; KDELR2;<br>PIK3C2A; SEC24A;<br>DYNC1LI2; GDI2; | 23011; 130340; 5286; 5869;<br>10092; 9698; 90411; 288; 51762;<br>950; 1362; 10000; 9265; 6399;<br>9135; 6272; 5537; 10254; 2590;<br>5872; 10971; 51422; 55014;<br>8905; 3267; 11021; 10342;<br>201475; 51272; 1783; 55667;<br>10484; 2017; 2665; 10802; 372;<br>27333; 11014; 51510; 64746;<br>55083; 143187; 9570; 23258;<br>3949; 1211; 22872; 11031; 11258 | 580  | 579            |

|          |          |                            |          |               |                                                                                                                                                                                                                                              |                                                                                                                                                                                                                                                                                                                                   |     |     |
|----------|----------|----------------------------|----------|---------------|----------------------------------------------------------------------------------------------------------------------------------------------------------------------------------------------------------------------------------------------|-----------------------------------------------------------------------------------------------------------------------------------------------------------------------------------------------------------------------------------------------------------------------------------------------------------------------------------|-----|-----|
|          |          |                            |          |               | MCFD2; CYTH3; GOSR2;<br>GALNT2; RAB21; BET1L;<br>SCARB2; TFG; TRAPPC2;<br>LDLR; GOLIM4; ARCN1;<br>ACBD3; ANK3; VTI1A;<br>STX17; SORT1; AGFG1                                                                                                 |                                                                                                                                                                                                                                                                                                                                   |     |     |
| 2,55E-10 | 8,42E-09 | Vesicle-mediated transport | Reactome | R-HSA-5653656 | CTTN; PUM1; DENND5A;<br>PRKAG2; CPD; KIF26B;<br>AKT3; CLTA; AP1S2;<br>AP1S3; DCTN3; CHMP5;<br>RAB8B; RAB35; GOLIM4;<br>HSPH1; RAB31; HYOU1;<br>STAM2; YWHAQ; PPP6C;<br>SEC31A; RABEP1;<br>RAB13; RAB12;<br>DENND4C; RAB5B;<br>ARPC5; KDELR2; | 23011; 5286; 5869; 10092; 9698;<br>201475; 90411; 288; 10802; 950;<br>10000; 9265; 6399; 9135; 6272;<br>5537; 10254; 1362; 2590; 10971;<br>130340; 51422; 55014; 8905;<br>3267; 11021; 10342; 3949;<br>10808; 51272; 55667; 1783;<br>10484; 2017; 2665; 51762; 372;<br>27333; 11014; 51510; 64746;<br>55083; 143187; 9570; 23258; | 619 | 618 |

|          |          |                                                |      |               |                                                                                                                                                                                        |                                                                                                                                                              |     |     |
|----------|----------|------------------------------------------------|------|---------------|----------------------------------------------------------------------------------------------------------------------------------------------------------------------------------------|--------------------------------------------------------------------------------------------------------------------------------------------------------------|-----|-----|
|          |          |                                                |      |               | PIK3C2A; SEC24A;<br>DYNC1LI2; GDI2;<br>MCFD2; CYTH3; GOSR2;<br>GALNT2; SEC23A;<br>RAB21; BET1L; SCARB2;<br>TFG; TRAPPC2; LDLR;<br>ARCN1; ACBD3; ANK3;<br>VTI1A; STX17; SORT1;<br>AGFG1 | 5872; 1211; 22872; 10525;<br>11031; 11258                                                                                                                    |     |     |
| 4,18E-09 | 9,20E-08 | Focal adhesion<br>- Homo<br>sapiens<br>(human) | KEGG | path:hsa04510 | CRKL; RAP1B; XIAP;<br>AKT3; CRK; ARHGAP5;<br>THBS1; CAV2; CAV1;<br>PIK3CB; JUN; TLN1;<br>CAPN2; PIK3R1; KDR;<br>IGF1R; PPP1R12B;<br>PRKCA; VCL; COL4A5;<br>COL4A3; PPP1CC;             | 1398; 4660; 5728; 7094; 5908;<br>3725; 5291; 5295; 3791; 7414;<br>1285; 1287; 10000; 824; 857;<br>858; 2932; 1399; 5501; 394;<br>7057; 3480; 331; 5063; 5578 | 201 | 200 |

|          |          |                                                       |          |               |                                                                                                                                                                                           |                                                                                                                                                                                            |     |     |
|----------|----------|-------------------------------------------------------|----------|---------------|-------------------------------------------------------------------------------------------------------------------------------------------------------------------------------------------|--------------------------------------------------------------------------------------------------------------------------------------------------------------------------------------------|-----|-----|
|          |          |                                                       |          |               | GSK3B; PTEN;<br>PAK3,ITGA1                                                                                                                                                                |                                                                                                                                                                                            |     |     |
| 1,27E-06 | 2,09E-05 | Neurotrophin signaling pathway - Homo sapiens (human) | KEGG     | path:hsa04722 | RPS6KA3; CRKL;<br>PTPN11; JUN; IRS1;<br>FRS2; AKT3; SORT1;<br>RIPK2; RAP1B; GSK3B;<br>PIK3R1; IRAK2; CRK;<br>IRAK1; PIK3CB                                                                | 6197; 8767; 10818; 3654; 3656;<br>3667; 6272; 3725; 5781; 5291;<br>5295; 10000; 5908; 2932; 1398;<br>1399                                                                                  | 121 | 121 |
| 2,02E-06 | 2,33E-05 | Signaling by PDGF                                     | Reactome | R-HSA-186797  | CRKL; RAP1B; SPRED2;<br>FRS2; PRKAR2B; CRK;<br>THBS1; IQGAP1; IRS1;<br>PIK3CB; TLN1; PIK3R1;<br>DUSP6; PIP4K2B; PTEN;<br>PRKCA; VCL; SPRED1;<br>COL4A5; COL4A3; ITPR1;<br>PTPN12; PTPN11; | 3667; 5567; 5578; 5577; 115;<br>1848; 10818; 200734; 7057;<br>1398; 5295; 5782; 5781; 8396;<br>5908; 5728; 5291; 7414; 1399;<br>8826; 6777; 7094; 2932; 161742;<br>1287; 10000; 3708; 1285 | 331 | 330 |

|  |  |  |  |  |                                       |  |  |
|--|--|--|--|--|---------------------------------------|--|--|
|  |  |  |  |  | ADCY9; GSK3B; STAT5B;<br>AKT3; PRKACB |  |  |
|--|--|--|--|--|---------------------------------------|--|--|

| p-value  | q-value  | pathway                                                 | source   | external_id   | members_input_overlap                                                                                                                                                  | members_input_overlap_geneids                                                                                                                                     | size | effective_size |
|----------|----------|---------------------------------------------------------|----------|---------------|------------------------------------------------------------------------------------------------------------------------------------------------------------------------|-------------------------------------------------------------------------------------------------------------------------------------------------------------------|------|----------------|
| 2,12E-06 | 2,33E-05 | Proteoglycans<br>in cancer -<br>Homo sapiens<br>(human) | KEGG     | path:hsa05205 | IGF1R; CTTN; PIK3R1;<br>ANK3; PIK3CB; THBS1;<br>PTPN11; PPP1CC;<br>RPS6KB1; MRAS; EZR;<br>FRS2; PRKCA; AKT3;<br>PPP1R12B; PRKACB;<br>ITPR1; CAV2; IQGAP1;<br>KDR; CAV1 | 7430; 4660; 6198; 10818; 10000;<br>8826; 3708; 5781; 5291; 5295;<br>3791; 5567; 22808; 288; 857;<br>858; 5501; 7057; 3480; 5578;<br>2017                          | 205  | 205            |
| 1,57E-05 | 0,000148 | Signalling by<br>NGF                                    | Reactome | R-HSA-166520  | CRKL; SPRED1; SPRED2;<br>FRS2; AKT3; CLTA; CRK;<br>IQGAP1; PIK3CB;<br>ARHGEF3; TLN1; ADCY9;<br>PIK3R1; IRAK1; DUSP3;                                                   | 5578; 1848; 9828; 200734; 5291;<br>8826; 8767; 7094; 10000; 3708;<br>3667; 5567; 5577; 1398; 5728;<br>6197; 2245; 7414; 8396; 10818;<br>161742; 3654; 1399; 1845; | 433  | 429            |

|          |          |                                                           |          |               |                                                                                                                                     |                                                                                                          |     |     |
|----------|----------|-----------------------------------------------------------|----------|---------------|-------------------------------------------------------------------------------------------------------------------------------------|----------------------------------------------------------------------------------------------------------|-----|-----|
|          |          |                                                           |          |               | PIP4K2B; FGD1;<br>ARHGEF17; PRKCA; VCL;<br>RAP1B; PRKAR2B; ITPR1;<br>RPS6KA3; DUSP6;<br>PTPN11; IRS1; GSK3B;<br>PTEN; RIPK2; PRKACB | 50650; 5295; 5781; 5908; 1211;<br>2932; 115                                                              |     |     |
| 2,14E-05 | 0,000169 | ER to Golgi<br>Anterograde<br>Transport                   | Reactome | R-HSA-199977  | SEC23A; TFG; TRAPPC2;<br>ARCN1; SEC24A; GOSR2;<br>ANK3; PPP6C; STX17;<br>DYNC1LI2; DCTN3;<br>KDELRL2; MCFD2; BET1L;<br>SEC31A       | 5537; 11014; 10484; 51272;<br>1783; 90411; 9570; 288; 55014;<br>22872; 10802; 372; 10342; 6399;<br>11258 | 134 | 134 |
| 2,69E-05 | 0,000169 | mTOR<br>signaling<br>pathway -<br>Homo sapiens<br>(human) | KEGG     | path:hsa04150 | ULK2; FNIP1; IGF1R;<br>RPS6KA3; ATP6V1A;<br>SGK1; PRKCA; PIK3CB;<br>SLC7A5; RPS6KB1; IRS1;                                          | 523; 6197; 6198; 3667; 5728;<br>5291; 96459; 10000; 6446; 5295;<br>2932; 6009; 3480; 5578; 8140;<br>9706 | 154 | 153 |



|  |  |  |  |  |                                    |  |  |
|--|--|--|--|--|------------------------------------|--|--|
|  |  |  |  |  | GSK3B; PTEN; AKT3;<br>PIK3R1; RHEB |  |  |
|--|--|--|--|--|------------------------------------|--|--|

| p-value  | q-value  | pathway       | source   | external_id  | members_input_overlap                                                                                                                                                                                                                                                 | members_input_overlap_geneids                                                                                                                                                                                               | size | effective_size |
|----------|----------|---------------|----------|--------------|-----------------------------------------------------------------------------------------------------------------------------------------------------------------------------------------------------------------------------------------------------------------------|-----------------------------------------------------------------------------------------------------------------------------------------------------------------------------------------------------------------------------|------|----------------|
| 2,73E-05 | 0,000169 | Axon guidance | Reactome | R-HSA-422475 | RAP1B; SPRED2; FRS2;<br>CLTA; GSK3B; PITPNA;<br>IQGAP1; DLG1; TLN1;<br>HSP90AB1; CDK5R1;<br>DUSP6; KDR; DPYSL2;<br>PRKCA; VCL; EFNA1;<br>SPRED1; COL4A5;<br>COL4A3; ARPC5; RHOB;<br>NRP1; NRP2; RPS6KA3;<br>PTPN11; IRS1; EZR;<br>PLXNA4; PFN2; ANK3;<br>PRKACB; PAK3 | 5578; 7430; 1848; 1739; 10092;<br>200734; 1287; 8829; 288; 8826;<br>7094; 1808; 1942; 3667; 5567;<br>3326; 1285; 6197; 5063; 5306;<br>5217; 10818; 388; 8828; 3791;<br>91584; 8851; 5781; 5908; 7414;<br>1211; 2932; 161742 | 487  | 484            |

|          |          |                                                              |          |               |                                                                                                                                                                                                                   |                                                                                                                                                                                |     |     |
|----------|----------|--------------------------------------------------------------|----------|---------------|-------------------------------------------------------------------------------------------------------------------------------------------------------------------------------------------------------------------|--------------------------------------------------------------------------------------------------------------------------------------------------------------------------------|-----|-----|
| 2,82E-05 | 0,000169 | NGF signalling<br>via TRKA from<br>the plasma<br>membrane    | Reactome | R-HSA-187037  | CRKL; RAP1B; SPRED2;<br>FRS2; PRKAR2B; CLTA;<br>CRK; GSK3B; IQGAP1;<br>PIK3CB; TLN1; PIK3R1;<br>DUSP6; DUSP3;<br>PIP4K2B; PRKCA; VCL;<br>SPRED1; ITPR1;<br>RPS6KA3; PTPN11; IRS1;<br>ADCY9; PTEN; AKT3;<br>PRKACB | 3667; 5567; 5578; 8396; 1399;<br>5577; 1845; 5728; 1848; 10818;<br>200734; 115; 5781; 1398; 5295;<br>1211; 5908; 6197; 5291; 7414;<br>8826; 7094; 2932; 161742;<br>10000; 3708 | 340 | 339 |
| 3,60E-05 | 0,000198 | Insulin<br>signaling<br>pathway -<br>Homo sapiens<br>(human) | KEGG     | path:hsa04910 | PRKAG2; ACACA;<br>PPP1CC; CRKL; PIK3CB;<br>MKNK1; RPS6KB1; IRS1;<br>GSK3B; AKT3; PIK3R1;<br>PRKACB; PRKAR2B; CRK;<br>RHEB                                                                                         | 31; 6198; 3667; 5291; 5295;<br>8569; 51422; 10000; 2932; 1398;<br>1399; 6009; 5501; 5567; 5577                                                                                 | 140 | 140 |

|          |          |                                      |          |              |                                                                                                                                                                                                     |                                                                                                                                                                      |     |     |
|----------|----------|--------------------------------------|----------|--------------|-----------------------------------------------------------------------------------------------------------------------------------------------------------------------------------------------------|----------------------------------------------------------------------------------------------------------------------------------------------------------------------|-----|-----|
| 4,00E-05 | 0,000203 | Downstream<br>signal<br>transduction | Reactome | R-HSA-186763 | CRKL; RAP1B; SPRED2;<br>FRS2; PRKAR2B; CRK;<br>IQGAP1; IRS1; PIK3CB;<br>TLN1; PIK3R1; DUSP6;<br>PIP4K2B; PTEN; PRKCA;<br>VCL; SPRED1; ITPR1;<br>PTPN11; ADCY9; GSK3B;<br>STAT5B; AKT3; PRKACB       | 3667; 5567; 5578; 5577; 115;<br>1848; 10818; 200734; 1398;<br>5295; 5781; 8396; 5908; 5728;<br>5291; 7414; 1399; 8826; 6777;<br>7094; 2932; 161742; 10000; 3708      | 307 | 306 |
| 7,37E-05 | 0,000348 | Signaling by<br>EGFR                 | Reactome | R-HSA-177929 | RAP1B; SPRED2; FRS2;<br>AKT3; IQGAP1; IRS1;<br>STAM2; TLN1; PIK3R1;<br>DUSP6; PIP4K2B; PRKCA;<br>VCL; SPRED1; ITPR1;<br>LRIG1; PTPN12; PTPN11;<br>ADCY9; GSK3B; PTEN;<br>PRKAR2B; PRKACB;<br>PIK3CB | 3667; 5567; 5578; 5577; 115;<br>5728; 10254; 1848; 10818;<br>200734; 5295; 5782; 5781; 8396;<br>5908; 5291; 7414; 8826; 7094;<br>2932; 161742; 10000; 3708;<br>26018 | 319 | 318 |

|          |          |                                                         |      |               |                                                                                                                          |                                                                                                                        |     |     |
|----------|----------|---------------------------------------------------------|------|---------------|--------------------------------------------------------------------------------------------------------------------------|------------------------------------------------------------------------------------------------------------------------|-----|-----|
| 0,000137 | 0,000599 | Rap1 signaling pathway - Homo sapiens (human)           | KEGG | path:hsa04015 | MRAS; LPAR1; IGF1R; CRKL; PRKCA; PIK3CB; ADCY9; EFNA1; TLN1; PFN2; AKT3; RAP1B; PIK3R1; CRK; THBS1; GNAI3; KDR; PRKD3    | 5291; 7094; 5217; 115; 23683; 5295; 3791; 10000; 5908; 22808; 2773; 7057; 1902; 1398; 1399; 3480; 1942; 5578           | 212 | 212 |
| 0,000145 | 0,000599 | Regulation of actin cytoskeleton - Homo sapiens (human) | KEGG | path:hsa04810 | ARPC5; FGD1; PIK3R1; CRKL; EZR; PIK3CB; PPP1CC; VCL; MRAS; GNG12; PFN2; CFL2; PPP1R12B; SSH1; CRK; PAK3; IQGAP1; PIP4K2B | 5217; 1073; 7430; 4660; 8826; 55970; 5291; 5295; 2245; 8396; 22808; 10092; 1398; 1399; 5501; 54434; 7414; 5063         | 214 | 213 |
| 0,000154 | 0,000599 | Pathways in cancer - Homo sapiens (human)               | KEGG | path:hsa05200 | CRKL; XIAP; AKT3; EDNRA; CRK; GNAI3; PTEN; PIK3CB; JUN; GNG12; HSP90AB1; PIK3R1; IGF1R; PRKCA;                           | 10342; 115; 331; 405; 6777; 55970; 2773; 54583; 861; 2932; 5291; 5295; 1285; 1287; 1387; 1398; 1399; 3480; 5567; 5578; | 397 | 397 |

|  |  |  |  |  |                                                                                                         |                                              |  |  |
|--|--|--|--|--|---------------------------------------------------------------------------------------------------------|----------------------------------------------|--|--|
|  |  |  |  |  | COL4A5; COL4A3;<br>EGLN1; ARNT; TFG;<br>ADCY9; GSK3B; STAT5B;<br>RUNX1; PRKACB;<br>CCDC6; LPAR1; CREBBP | 3326; 5728; 3725; 10000; 8030;<br>1902; 1909 |  |  |
|--|--|--|--|--|---------------------------------------------------------------------------------------------------------|----------------------------------------------|--|--|

| p-value  | q-value  | pathway                                  | source   | external_id   | members_input_overlap                                                                                                                                      | members_input_overlap_geneids                                                                                                                | size | effective_size |
|----------|----------|------------------------------------------|----------|---------------|------------------------------------------------------------------------------------------------------------------------------------------------------------|----------------------------------------------------------------------------------------------------------------------------------------------|------|----------------|
| 0,000226 | 0,000752 | Endocytosis -<br>Homo sapiens<br>(human) | KEGG     | path:hsa04144 | RAB35; IGF1R; RAB31;<br>SPG20; ACAP2; STAM2;<br>RAB5B; RAB11FIP1;<br>ARPC5; PSD3; AGAP1;<br>LDLR; CLTA; CHMP5;<br>RABEP1; CYTH3; CAV2;<br>ASAP1; KDR; CAV1 | 10254; 857; 9265; 23111; 50807;<br>1211; 3791; 5869; 11021; 11031;<br>23362; 51510; 858; 80223;<br>10092; 3949; 3480; 9135;<br>116987; 23527 | 260  | 260            |
| 0,000233 | 0,000752 | Transport to<br>the Golgi and            | Reactome | R-HSA-948021  | SEC23A; TFG; TRAPPC2;<br>ARCN1; SEC24A; GOSR2;<br>ANK3; PPP6C; STX17;                                                                                      | 5537; 11014; 10484; 51272;<br>1783; 90411; 9570; 288; 55014;                                                                                 | 165  | 165            |

|          |          |                                                                    |          |               |                                                                                                                                                                              |                                                                                                                                                                                                                                                               |      |      |
|----------|----------|--------------------------------------------------------------------|----------|---------------|------------------------------------------------------------------------------------------------------------------------------------------------------------------------------|---------------------------------------------------------------------------------------------------------------------------------------------------------------------------------------------------------------------------------------------------------------|------|------|
|          |          | subsequent modification                                            |          |               | DYNC1LI2; DCTN3;<br>KDEL2; MCFD2; BET1L;<br>SEC31A                                                                                                                           | 22872; 10802; 372; 10342; 6399;<br>11258                                                                                                                                                                                                                      |      |      |
| 0,000233 | 0,000752 | Protein processing in endoplasmic reticulum - Homo sapiens (human) | KEGG     | path:hsa04141 | BAG2; SEL1L; DNAJA1;<br>RAD23B; HSPH1; HSPA5;<br>HYOU1; SEC31A;<br>HSP90AB1; SEC24A;<br>CAPN2; EDEM1; PLAA;<br>CKAP4; SEC23A                                                 | 10802; 9532; 10808; 9373;<br>10970; 3301; 3309; 10484; 3326;<br>5887; 6400; 10525; 824; 22872;<br>9695                                                                                                                                                        | 166  | 165  |
| 0,000239 | 0,000752 | Post-translational protein modification                            | Reactome | R-HSA-597592  | RECK; UBE2B; RAD23B;<br>CLSPN; SMAD7;<br>MAP3K7; RIPK2; RHOT1;<br>DCTN3; USP25; SEC31A;<br>RAB8B; RAB35; SEC23A;<br>RAB31; STAM2;<br>ADAMTS8; THBS1;<br>PPP6C; PHC3; PTP4A2; | 23011; 1605; 4092; 5277; 5869;<br>11095; 10735; 29761; 90411;<br>288; 5872; 6885; 51762; 8767;<br>5537; 10484; 10254; 2590; 7057;<br>80012; 55288; 5728; 55014;<br>6399; 63967; 55236; 8073;<br>11021; 10342; 142; 201475;<br>51272; 1783; 7324; 56648; 6400; | 1026 | 1025 |

|          |          |                      |          |              |                                                                                                                                                                                                                                                                     |                                                                                                                                               |     |     |
|----------|----------|----------------------|----------|--------------|---------------------------------------------------------------------------------------------------------------------------------------------------------------------------------------------------------------------------------------------------------------------|-----------------------------------------------------------------------------------------------------------------------------------------------|-----|-----|
|          |          |                      |          |              | RAB13; RAB12; SMC1A;<br>PIGA; SEL1L; GNPAT1;<br>RAB5B; STAG2; SENP5;<br>UBE2E1; PARP1; UBA6;<br>GOSR2; SEC24A; DAG1;<br>DYNC1LI2; MCFD2;<br>GALNT2; UBE2I; RAB21;<br>UBE2K; BET1L; UBE2A;<br>TFG; TRAPPC2; ARCN1;<br>PTEN; ANK3; STX17;<br>KDEL2; EIF5A2;<br>TOMM20 | 10802; 372; 8434; 11014; 7319;<br>64841; 8243; 9570; 205564;<br>3093; 7320; 9804; 7329; 22872;<br>5887; 11031; 11258                          |     |     |
| 0,000345 | 0,001036 | Signaling by<br>VEGF | Reactome | R-HSA-194138 | IQGAP1; ITPR1; PRKCA;<br>PIK3CB; VCL; IRS1;<br>SPRED2; FRS2; PAK3;<br>AKT3; RAP1B; TLN1;<br>PIK3R1; PRKACB; NRP2;                                                                                                                                                   | 3667; 5567; 5578; 3791; 3708;<br>1848; 10818; 200734; 1398;<br>5295; 857; 8829; 5908; 5291;<br>7414; 8826; 7094; 161742;<br>10000; 8828; 5063 | 290 | 289 |

|          |          |                                                               |          |                   |                                                                                                                                                                            |                                                                                                                                                    |            |
|----------|----------|---------------------------------------------------------------|----------|-------------------|----------------------------------------------------------------------------------------------------------------------------------------------------------------------------|----------------------------------------------------------------------------------------------------------------------------------------------------|------------|
|          |          |                                                               |          |                   | CRK; DUSP6; SPRED1;<br>NRP1; KDR; CAV1                                                                                                                                     |                                                                                                                                                    |            |
| 0,000865 | 0,002482 | DAP12<br>signaling                                            | Reactome | R-HSA-<br>2424491 | IQGAP1; ITPR1; PRKCA;<br>VCL; PTPN11; GSK3B;<br>FRS2; ADCY9; SPRED2;<br>IRS1; AKT3; PTEN;<br>PRKAR2B; RAP1B; TLN1;<br>PIK3R1; PRKACB;<br>DUSP6; SPRED1; PIK3CB;<br>PIP4K2B | 3667; 5567; 5578; 5577; 115;<br>1848; 10818; 200734; 5295;<br>5781; 8396; 5908; 5728; 5291;<br>7414; 8826; 7094; 2932; 161742;<br>10000; 3708      | 311<br>310 |
| 0,001197 | 0,003292 | PI3K-Akt<br>signaling<br>pathway -<br>Homo sapiens<br>(human) | KEGG     | path:hsa04151     | AKT3; MCL1; PIK3CB;<br>YWHAQ; RPS6KB1;<br>GNG12; THBS1;<br>HSP90AB1; PIK3R1; KDR;<br>IGF1R; PRKCA; EFNA1;<br>COL4A5; COL4A3; RHEB;                                         | 1285; 3326; 6198; 5728; 4170;<br>3667; 55970; 2932; 3791; 6009;<br>1287; 10000; 6446; 10971; 7057;<br>1902; 64764; 1942; 3480; 5578;<br>5291; 5295 | 341<br>340 |



|          |         |                          |          |                   |                                                                                                                                                                                                                                                                                                                                                                                  |                                                                                                                                                                                                                                                                                                 |     |     |
|----------|---------|--------------------------|----------|-------------------|----------------------------------------------------------------------------------------------------------------------------------------------------------------------------------------------------------------------------------------------------------------------------------------------------------------------------------------------------------------------------------|-------------------------------------------------------------------------------------------------------------------------------------------------------------------------------------------------------------------------------------------------------------------------------------------------|-----|-----|
|          |         |                          |          |                   | SGK1; IRS1; GSK3B;<br>CREB3L2; PTEN; LPAR1                                                                                                                                                                                                                                                                                                                                       |                                                                                                                                                                                                                                                                                                 |     |     |
| 0,001318 | 0,00336 | Developmental<br>Biology | Reactome | R-HSA-<br>1266738 | RAP1B; SPRED2; FRS2;<br><br>AKT3; CLTA; GSK3B;<br><br>PITPNA; IQGAP1; DLG1;<br><br>TLN1; HSP90AB1;<br><br>TSC22D1; MED13;<br><br>CDK5R1; DUSP6; KDR;<br><br>DPYSL2; PRKCA; TCF12;<br><br>VCL; EFNA1; SPRED1;<br><br>COL4A5; COL4A3;<br><br>ARPC5; RHOB; NRP1;<br><br>NRP2; RPS6KA3;<br><br>PTPN11; IRS1; EZR;<br><br>PLXNA4; DSP; PFN2;<br><br>ANK3; PRKACB; CREBBP;<br><br>PAK3 | 5578; 1848; 1739; 10092;<br><br>200734; 8829; 288; 8826; 1808;<br><br>7094; 7430; 1942; 6938; 3667;<br><br>5567; 8848; 10000; 3326; 1285;<br><br>6197; 5908; 1287; 5063; 5306;<br><br>5217; 10818; 388; 1387; 8828;<br><br>9969; 3791; 91584; 8851; 1832;<br><br>5781; 7414; 1211; 2932; 161742 | 748 | 745 |

|          |         |                        |          |              |                                                                                                                                                                                                                                                                                                                                                                                                                                                                                                                                                                                                                                                                                                                                                                                                                                                                                     |      |      |
|----------|---------|------------------------|----------|--------------|-------------------------------------------------------------------------------------------------------------------------------------------------------------------------------------------------------------------------------------------------------------------------------------------------------------------------------------------------------------------------------------------------------------------------------------------------------------------------------------------------------------------------------------------------------------------------------------------------------------------------------------------------------------------------------------------------------------------------------------------------------------------------------------------------------------------------------------------------------------------------------------|------|------|
| 0,001323 | 0,00336 | Metabolism of proteins | Reactome | R-HSA-392499 | RECK; UBE2B; RAD23B;<br>23011; 29761; 64841; 6885;<br>VBP1; HSPA5; CLSPN;<br>401505; 6399; 10254; 3093;<br>SMAD7; SEL1L;<br>51272; 56648; 1974; 8434; 3309;<br>ADAMTS8; RIPK2;<br>142; 22872; 5887; 9512; 5869;<br>RHOT1; DCTN3; USP25;<br>11095; 55970; 5537; 63967;<br>THBS1; SLC30A7;<br>11021; 7411; 3624; 7319; 9570;<br>SEC31A; RAB8B; RAB35;<br>10970; 148867; 11031; 10802;<br>TOMM5; PMPCB;<br>10484; 2590; 5728; 6731; 8073;<br>RAB31; STAM2; FKBP9;<br>10342; 2773; 201475; 372;<br>MAP3K7; GNG12;<br>55288; 3487; 11014; 288; 8243;<br>GNAI3; INHBA;<br>7320; 9804; 1605; 4092; 5277;<br>DYNC1LI2; PPP6C; PHC3;<br>10735; 90411; 10238; 8767;<br>PTP4A2; RAB13; BET1L;<br>5872; 7057; 80012; 55014;<br>SMC1A; PIGA; GSPT1;<br>55236; 2935; 1783; 7324; 11328;<br>GNPNAT1; RAB5B;<br>6400; 51762; 7329; 205564;<br>STAG2; RAB12; SENP5;<br>11258<br>UBE2E1; PARP1; UBA6; | 1506 | 1502 |
|----------|---------|------------------------|----------|--------------|-------------------------------------------------------------------------------------------------------------------------------------------------------------------------------------------------------------------------------------------------------------------------------------------------------------------------------------------------------------------------------------------------------------------------------------------------------------------------------------------------------------------------------------------------------------------------------------------------------------------------------------------------------------------------------------------------------------------------------------------------------------------------------------------------------------------------------------------------------------------------------------|------|------|

|  |  |  |  |  |                                                                                                                                                                                                     |  |  |
|--|--|--|--|--|-----------------------------------------------------------------------------------------------------------------------------------------------------------------------------------------------------|--|--|
|  |  |  |  |  | KDELR2; SEC24A; DAG1;<br>IGFBP4; MCFD2;<br>GALNT2; SEC23A; UBE2I;<br>RAB21; UBE2K; SRP72;<br>UBE2A; TFG; TRAPPC2;<br>ARCN1; TOMM20;<br>PTEN; ANK3; DCAF7;<br>STX17; GOSR2; EIF5A2;<br>CKAP4; EIF4A2 |  |  |
|--|--|--|--|--|-----------------------------------------------------------------------------------------------------------------------------------------------------------------------------------------------------|--|--|

| p-value | q-value  | pathway                                          | source | external_id   | members_input_overlap                                                                                     | members_input_overlap_geneids                                                                                        | size | effective_size |
|---------|----------|--------------------------------------------------|--------|---------------|-----------------------------------------------------------------------------------------------------------|----------------------------------------------------------------------------------------------------------------------|------|----------------|
| 0,00143 | 0,003496 | HTLV-I<br>infection -<br>Homo sapiens<br>(human) | KEGG   | path:hsa05166 | DLG1; CDC16; BUB3;<br>PIK3CB; JUN; ADCY9;<br>MRAS; STAT5B; XIAP;<br>AKT3; POLE3; TLN1;<br>PIK3R1; PRKACB; | 5295; 1739; 10000; 115; 6777;<br>8829; 3725; 5291; 8881; 1387;<br>22808; 54107; 2932; 7094; 5567;<br>331; 9184; 4603 | 258  | 258            |

|          |          |                             |          |                   |                                                                                                                                                                            |                                                                                                                                               |            |
|----------|----------|-----------------------------|----------|-------------------|----------------------------------------------------------------------------------------------------------------------------------------------------------------------------|-----------------------------------------------------------------------------------------------------------------------------------------------|------------|
|          |          |                             |          |                   | MYBL1; GSK3B; NRP1;<br>CREBBP                                                                                                                                              |                                                                                                                                               |            |
| 0,001536 | 0,003557 | VEGFA-<br>VEGFR2<br>Pathway | Reactome | R-HSA-<br>4420097 | ITPR1; PRKCA; PIK3CB;<br>VCL; IRS1; SPRED2;<br>FRS2; PAK3; AKT3;<br>RAP1B; TLN1; PIK3R1;<br>PRKACB; CRK; DUSP6;<br>SPRED1; IQGAP1; KDR;<br>CAV1                            | 3667; 5567; 5578; 3791; 1848;<br>10818; 200734; 1398; 5295; 857;<br>5908; 5291; 7414; 8826; 7094;<br>161742; 10000; 3708; 5063                | 282<br>281 |
| 0,001563 | 0,003557 | DAP12<br>interactions       | Reactome | R-HSA-<br>2172127 | IQGAP1; ITPR1; PRKCA;<br>VCL; PTPN11; GSK3B;<br>FRS2; ADCY9; SPRED2;<br>IRS1; AKT3; PTEN;<br>PRKAR2B; RAP1B; TLN1;<br>PIK3R1; PRKACB;<br>DUSP6; SPRED1; PIK3CB;<br>PIP4K2B | 3667; 5567; 5578; 5577; 115;<br>1848; 10818; 200734; 5295;<br>5781; 8396; 5908; 5728; 5291;<br>7414; 8826; 7094; 2932; 161742;<br>10000; 3708 | 326<br>325 |

|          |          |                                                |          |               |                                                                                                                                                           |                                                                                                                             |     |     |
|----------|----------|------------------------------------------------|----------|---------------|-----------------------------------------------------------------------------------------------------------------------------------------------------------|-----------------------------------------------------------------------------------------------------------------------------|-----|-----|
| 0,003897 | 0,008298 | Asparagine N-linked glycosylation              | Reactome | R-HSA-446203  | SEL1L; GNPAT1;<br>SEC23A; TFG; TRAPPC2;<br>RAD23B; ARCN1;<br>SEC24A; KDELR2; ANK3;<br>PPP6C; STX17;<br>DYNC1LI2; DCTN3;<br>GOSR2; MCFD2; BET1L;<br>SEC31A | 5537; 51272; 10484; 1783;<br>64841; 6399; 90411; 9570; 288;<br>55014; 6400; 22872; 10802; 372;<br>10342; 11014; 5887; 11258 | 283 | 283 |
| 0,003897 | 0,008298 | Platelet activation, signaling and aggregation | Reactome | R-HSA-76002   | ITPR1; GNAI3; WDR1;<br>HSPA5; PRKCA; PTPN11;<br>VCL; RAP1B; GNG12;<br>THBS1; AKT3; PIK3CB;<br>LAMP2; PIK3R1; CRK;<br>RHOB; TLN1; SERPINE1                 | 7414; 388; 5578; 3309; 3920;<br>7057; 5054; 1398; 55970; 5295;<br>2773; 5781; 5908; 5291; 9948;<br>7094; 10000; 3708        | 283 | 283 |
| 0,0052   | 0,010573 | Signaling by SCF-KIT                           | Reactome | R-HSA-1433557 | IQGAP1; STAT5B;<br>PRKCA; PIK3CB; GSK3B;<br>VCL; IRS1; SPRED2;                                                                                            | 3667; 5578; 1848; 8396; 10818;<br>200734; 5728; 5295; 5908; 5291;                                                           | 292 | 291 |

|          |          |                                                       |          |                   |                                                                                                                    |                                                                                                        |     |     |
|----------|----------|-------------------------------------------------------|----------|-------------------|--------------------------------------------------------------------------------------------------------------------|--------------------------------------------------------------------------------------------------------|-----|-----|
|          |          |                                                       |          |                   | FRS2; PTEN; AKT3;<br>RAP1B; TLN1; PIK3R1;<br>DUSP6; SPRED1;<br>PTPN11; PIP4K2B                                     | 7414; 5781; 8826; 6777; 7094;<br>2932; 161742; 10000                                                   |     |     |
| 0,005286 | 0,010573 | Interleukin-3,<br>5 and GM-CSF<br>signaling           | Reactome | R-HSA-512988      | CRKL; IQGAP1; PIK3CB;<br>VCL; IRS1; SPRED2;<br>FRS2; STAT5B; RAP1B;<br>TLN1; PIK3R1; CRK;<br>DUSP6; SPRED1; PTPN11 | 3667; 1399; 1848; 10818;<br>200734; 1398; 5295; 5908; 5291;<br>7414; 5781; 8826; 6777; 7094;<br>161742 | 226 | 225 |
| 0,00596  | 0,01157  | Ras signaling<br>pathway -<br>Homo sapiens<br>(human) | KEGG     | path:hsa04014     | IGF1R; RAB5B; RGL1;<br>PIK3CB; RAP1B; GNG12;<br>MRAS; PRKCA; AKT3;<br>EFNA1; PIK3R1; PRKACB;<br>PTPN11; KDR; PAK3  | 10000; 5908; 23179; 5781;<br>55970; 5291; 3791; 22808; 5295;<br>5869; 1942; 3480; 5567; 5063;<br>5578  | 229 | 228 |
| 0,006422 | 0,011774 | IRS-related<br>events                                 | Reactome | R-HSA-<br>2428928 | IGF1R; RHEB; IQGAP1;<br>VCL; PTPN11; PRKAG2;<br>RPS6KB1; IRS1; SPRED2;                                             | 3667; 1848; 10818; 6009;<br>200734; 51422; 5781; 6198;                                                 | 254 | 252 |

|          |          |                            |          |                   |                                                                                                                                  |                                                                                                               |     |     |
|----------|----------|----------------------------|----------|-------------------|----------------------------------------------------------------------------------------------------------------------------------|---------------------------------------------------------------------------------------------------------------|-----|-----|
|          |          | triggered by<br>IGF1R      |          |                   | FRS2; RAP1B; TLN1;<br>PIK3R1; DUSP6; SPRED1;<br>PIK3CB                                                                           | 5908; 5291; 7414; 5295; 8826;<br>7094; 161742; 3480                                                           |     |     |
| 0,006422 | 0,011774 | IGF1R signaling<br>cascade | Reactome | R-HSA-<br>2428924 | IGF1R; RHEB; IQGAP1;<br>VCL; PTPN11; PRKAG2;<br>RPS6KB1; IRS1; SPRED2;<br>FRS2; RAP1B; TLN1;<br>PIK3R1; DUSP6; SPRED1;<br>PIK3CB | 3667; 1848; 10818; 6009;<br>200734; 51422; 5781; 6198;<br>5908; 5291; 7414; 5295; 8826;<br>7094; 161742; 3480 | 254 | 252 |

| p-value  | q-value  | pathway                                                                           | source   | external_id       | members_input_overlap                                                                                                            | members_input_overlap_geneids                                                                                 | size | effective_size |
|----------|----------|-----------------------------------------------------------------------------------|----------|-------------------|----------------------------------------------------------------------------------------------------------------------------------|---------------------------------------------------------------------------------------------------------------|------|----------------|
| 0,006664 | 0,011886 | Signaling by<br>Type 1 Insulin-<br>like Growth<br>Factor 1<br>Receptor<br>(IGF1R) | Reactome | R-HSA-<br>2404192 | IGF1R; RHEB; IQGAP1;<br>VCL; PTPN11; PRKAG2;<br>RPS6KB1; IRS1; SPRED2;<br>FRS2; RAP1B; TLN1;<br>PIK3R1; DUSP6; SPRED1;<br>PIK3CB | 3667; 1848; 10818; 6009;<br>200734; 51422; 5781; 6198;<br>5908; 5291; 7414; 5295; 8826;<br>7094; 161742; 3480 | 255  | 253            |

|          |          |                           |          |              |                                                                                                                                                                      |                                                                                                                                                |     |     |
|----------|----------|---------------------------|----------|--------------|----------------------------------------------------------------------------------------------------------------------------------------------------------------------|------------------------------------------------------------------------------------------------------------------------------------------------|-----|-----|
| 0,007497 | 0,013021 | Signaling by Interleukins | Reactome | R-HSA-449147 | SOCS5; IRAK1; FBXW11;<br>CRKL; IRS1; IQGAP1;<br>VCL; PIK3CB; FRS2;<br>MAP3K7; SPRED2; TLN1;<br>STAT5B; RIPK2; RAP1B;<br>PIK3R1; IRAK2; CRK;<br>DUSP6; SPRED1; PTPN11 | 1848; 200734; 6885; 5291; 8767;<br>7094; 3667; 3656; 1398; 6777;<br>10818; 7414; 3654; 1399; 23291;<br>5295; 9655; 5781; 5908; 8826;<br>161742 | 373 | 372 |
|----------|----------|---------------------------|----------|--------------|----------------------------------------------------------------------------------------------------------------------------------------------------------------------|------------------------------------------------------------------------------------------------------------------------------------------------|-----|-----|



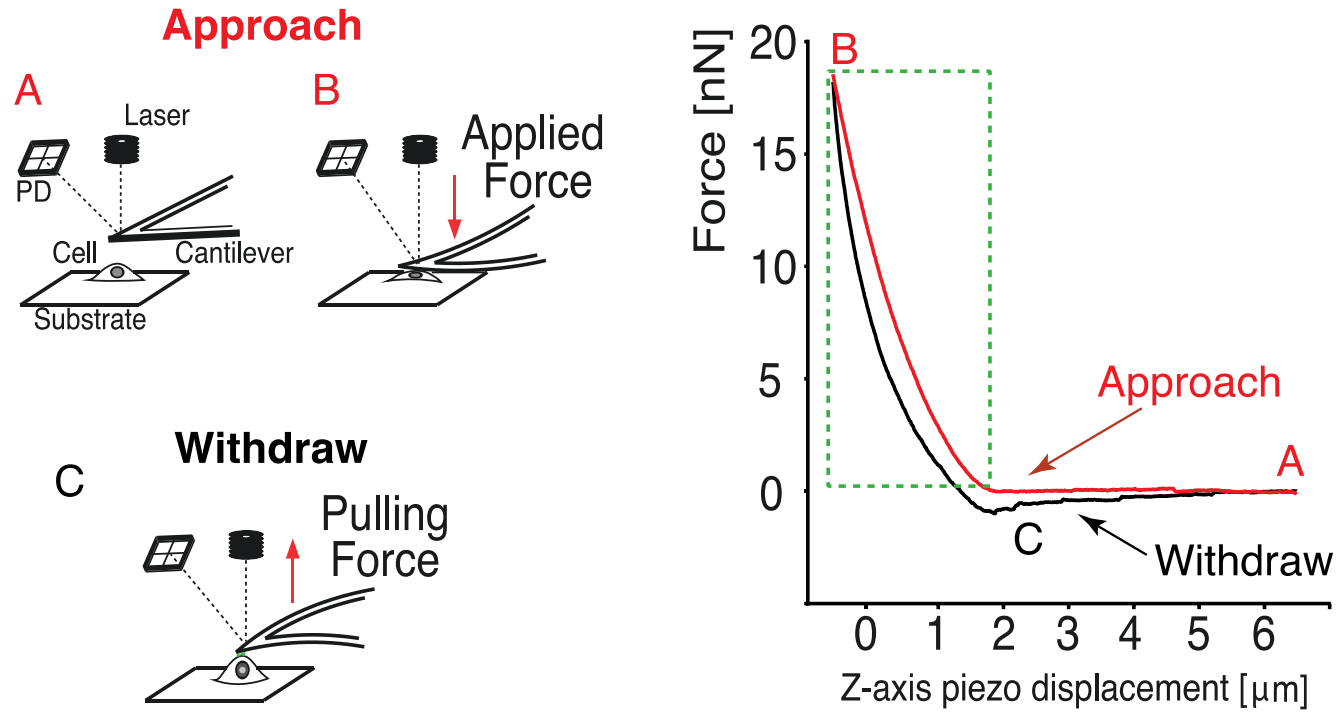

### Supplementary Figure S2.

(A) Cartoon representative of single cell force spectroscopy by AFM. A single living cell is approached by the AFM cantilever (A), recording a force-distance curve (red curve) until the maximum cell compression is reached (B). Thereafter, the cantilever is pulled-off from the cell (C) and a withdraw curve is recorded (black curve). Hysteresis between the curves along y-axis defines the plasticity index (green dashed box).

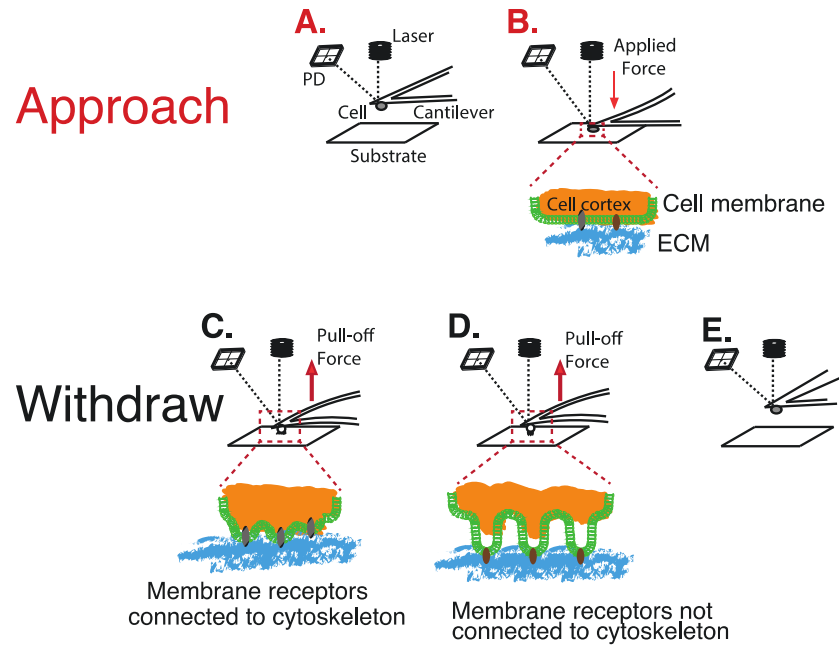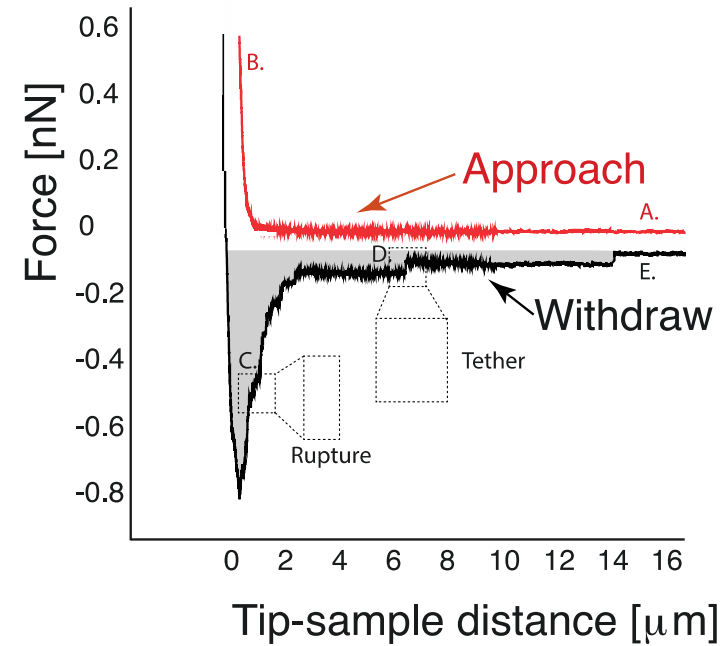

### Supplementary Figure S3

(A) Representative cartoon of a typical cell-to-ECM interaction measurement by AFM. In the approaching phase (red curve), a cell is captured, attached and let adhere to a fibronectin functionalized cantilever (A); next, cell is pressed with a constant force, over a surface coated with the ECM protein of interest, to establish a firm interaction between the cell and the substrate (B). Thereafter, the cell is pulled-off (withdraw phase – black curve) and the interactions between ECM and the cell membrane adhesion receptors linked (ruptures – C) or not linked (tethers – D) to the cytoskeleton are recorded (E). The energy required to detach each cell from the specific substrate (work of detachment – grey area) is also recorded.
